# Supplementary material for: High-throughput experimentation for discovery of biodegradable polyesters
Source: PubMed Central journal article supplement — Proc Natl Acad Sci U S A. 2023 May 30;120(23):e2220021120. doi: 10.1073/pnas.2220021120 (PMC10266013; doi:10.1073/pnas.2220021120), 2023-05-30
Supplement: pnas.2220021120.sd04.pdf [file pnas.2220021120.sd04.pdf]

**Supplementary Dataset S4: Polymer Library Members**

| Polymer Number | Monomer 1              | Monomer 2                                                     | Mn (kDa) | Mw (kDa) | D    | Monomer 1: Monomer 2 (mole basis) | BigSMILES                                                                            | Method Key |
|----------------|------------------------|---------------------------------------------------------------|----------|----------|------|-----------------------------------|--------------------------------------------------------------------------------------|------------|
| 1              | Malonyl Chloride       | Bisphenol A                                                   | 19.11    | 41.07    | 2.15 | 1:1                               | <chem>{[&lt;]C(=O)CC(=O)[&lt;],[&gt;]Oc1ccc(cc1)C(C)(C)c2ccc(cc2)O[&gt;]}</chem>     | M32        |
| 2              | Terephthaloyl Chloride | 2,5-hexanediol(+isomers)                                      |          |          |      | 1:1                               | <chem>{[&lt;]C(=O)c1ccc(cc1)C(=O)[&lt;],[&gt;]OC(C)CCC(C)O[&gt;]}</chem>             | M32        |
| 3              | Terephthaloyl Chloride | 1,8-octanediol                                                |          |          |      | 1:1                               | <chem>{[&lt;]C(=O)c1ccc(cc1)C(=O)[&lt;],[&gt;]OCCCCCCC[&gt;]}</chem>                 | M32        |
| 4              | Terephthaloyl Chloride | 1,9-nonanediol                                                |          |          |      | 1:1                               | <chem>{[&lt;]C(=O)c1ccc(cc1)C(=O)[&lt;],[&gt;]OCCCCCCC[&gt;]}</chem>                 | M32        |
| 5              | Terephthaloyl Chloride | 1,10-decanediol                                               |          |          |      | 1:1                               | <chem>{[&lt;]C(=O)c1ccc(cc1)C(=O)[&lt;],[&gt;]OCCCCCCC[&gt;]}</chem>                 | M32        |
| 6              | Terephthaloyl Chloride | 2,2,4-Trimethyl-1,3-pentanediol                               |          |          |      | 1:1                               | <chem>{[&lt;]C(=O)c1ccc(cc1)C(=O)[&lt;],[&gt;]OCC(C)(C)C(C)O[&gt;]}</chem>           | M32        |
| 7              | Terephthaloyl Chloride | 2,2-Dimethyl-1,3-propanediol                                  |          |          |      | 1:1                               | <chem>{[&lt;]C(=O)c1ccc(cc1)C(=O)[&lt;],[&gt;]OCC(C)(C)CO[&gt;]}</chem>              | M32        |
| 8              | Terephthaloyl Chloride | 4,8-Bis(hydroxymethyl)tricyclo[5.2.1.0 <sup>2,6</sup> ]decane |          |          |      | 1:1                               | <chem>{[&lt;]C(=O)c1ccc(cc1)C(=O)[&lt;],[&gt;]OCC(CC(C1)C2C3)C1C2CC3CO[&gt;]}</chem> | M32        |
| 9              | Terephthaloyl Chloride | 2,3-Butanediol                                                |          |          |      | 1:1                               | <chem>{[&lt;]C(=O)c1ccc(cc1)C(=O)[&lt;],[&gt;]OC(C)C(C)O[&gt;]}</chem>               | M32        |
| 10             | Terephthaloyl Chloride | 1,4-Cyclohexanediol                                           |          |          |      | 1:1                               | <chem>{[&lt;]C(=O)c1ccc(cc1)C(=O)[&lt;],[&gt;]OC(CC1)CC1O[&gt;]}</chem>              | M32        |

Supplementary Dataset S4: Polymer Library Members

|    |                        |                                              |     |                                                                                          |     |
|----|------------------------|----------------------------------------------|-----|------------------------------------------------------------------------------------------|-----|
| 11 | Terephthaloyl Chloride | diethylene glycol                            | 1:1 | <chem>{[O][C](=O)c1ccc(cc1)C(=O)[O][C]OCCOCCO}</chem>                                    | M32 |
| 12 | Terephthaloyl Chloride | triethylene glycol                           | 1:1 | <chem>{[O][C](=O)c1ccc(cc1)C(=O)[O][C]OCCOCCOCCO}</chem>                                 | M32 |
| 13 | Terephthaloyl Chloride | 4,4'-Sulfonylbis(2-methylphenol)             | 1:1 | <chem>{[O][C](=O)c1ccc(cc1)C(=O)[O]c1c(C)cc(cc1)S(=O)(=O)c2ccc(c(C)c2)O}</chem>          | M32 |
| 14 | Terephthaloyl Chloride | 2-Hydroxyethyl disulfide                     | 1:1 | <chem>{[O][C](=O)c1ccc(cc1)C(=O)[O][C]OCCSSCCO}</chem>                                   | M32 |
| 15 | Terephthaloyl Chloride | 1,3-Bis[2-(4-hydroxyphenyl)-2-propyl]benzene | 1:1 | <chem>{[O][C](=O)c1ccc(cc1)C(=O)[O]c1ccc(cc1)C(C)(C)c2ccc(cc2)C(C)(C)c3ccc(cc3)O}</chem> | M32 |
| 16 | Terephthaloyl Chloride | 4,4'-(alpha-Methylbenzylidene)bisphenol      | 1:1 | <chem>{[O][C](=O)c1ccc(cc1)C(=O)[O]c1ccc(cc1)C(C)(c2ccccc2)c3ccc(cc3)O}</chem>           | M32 |
| 17 | Terephthaloyl Chloride | 4,4'-Isopropylidenebis(2,6-dimethylphenol)   | 1:1 | <chem>{[O][C](=O)c1ccc(cc1)C(=O)[O]c1c(C)cc(cc1(C))C(C)(C)c2cc(C)c(C)c2}O}</chem>        | M32 |
| 18 | Terephthaloyl Chloride | 4,4'-(9-Fluorenylidene)di phenol             | 1:1 | <chem>{[O][C](=O)c1ccc(cc1)C(=O)[O]c1ccc(cc1)C2(c3ccccc3c4c2ccccc4)c5ccc(cc5)O}</chem>   | M32 |
| 19 | Terephthaloyl Chloride | 4,4'-Cyclohexylidenebisphenol                | 1:1 | <chem>{[O][C](=O)c1ccc(cc1)C(=O)[O]c1ccc(cc1)C2(CCCC2)c3cc(cc3)O}</chem>                 | M32 |

Supplementary Dataset S4: Polymer Library Members

|    |                        |                                              |      |       |      |     |                                                                                     |     |
|----|------------------------|----------------------------------------------|------|-------|------|-----|-------------------------------------------------------------------------------------|-----|
| 20 | Terephthaloyl Chloride | (R)-(+)-1,1'-Binaphthyl-2,2'-diol            |      |       |      | 1:1 | <chem>{[O=C]c1ccc(cc1)C(=O)[O]c1ccc(ccc2)c2c1c3c(cccc4)c4ccc3O[O]}</chem>           | M32 |
| 21 | Phthaloyl Chloride     | 4,4'-Thiodiphenol                            | 3.55 | 6.65  | 1.87 | 1:1 | <chem>{[O=C]c(cccc1)c1C(=O)[O]c1ccc(cc1)Sc2ccc(cc2)O[O]}</chem>                     | M32 |
| 23 | Malonyl Chloride       | Naphthalene-1,5-diol                         |      |       |      | 1:1 | <chem>{[O=C]C(=O)C(=O)[O]c1c(ccc2)c(ccc1)c2O[O]}</chem>                             | M32 |
| 24 | Diglycolyl Chloride    | 1,3-Bis[2-(4-hydroxyphenyl)-2-propyl]benzene | 9.96 | 11.85 | 1.19 | 1:1 | <chem>{[O=C]C(=O)COC(=O)[O]c1ccc(cc1)C(C)(C)c2ccc(cc2)C(C)(C)c3ccc(cc3)O[O]}</chem> | M32 |
| 25 | Phthaloyl Chloride     | Dianhydro-D-glucitol                         |      |       |      | 1:1 | <chem>{[O=C]c(cccc1)c1C(=O)[O]C(C1CO1)C(C2CO2)O[O]}</chem>                          | M32 |
| 26 | Phthaloyl Chloride     | cis-2-Butene-1,4-diol                        |      |       |      | 1:1 | <chem>{[O=C]c(cccc1)c1C(=O)[O]C/C=C/O[O]}</chem>                                    | M32 |
| 27 | Diglycolyl Chloride    | 4,4'-(alpha-Methylbenzylidene)bisphenol      | 4.43 | 5.26  | 1.19 | 1:1 | <chem>{[O=C]C(=O)COC(=O)[O]c1ccc(cc1)C(C)(c2ccccc2)c3ccc(cc3)O[O]}</chem>           | M32 |
| 28 | Oxalyl Chloride        | 1,3-Bis[2-(4-hydroxyphenyl)-2-propyl]benzene |      |       |      | 1:1 | <chem>{[O=C]C(=O)C(=O)[O]c1ccc(cc1)C(C)(C)c2ccc(cc2)C(C)(C)c3ccc(cc3)O[O]}</chem>   | M32 |
| 29 | Diglycolyl Chloride    | 4,4'-Cyclohexylidenebisphenol                | 3.64 | 4.34  | 1.19 | 1:1 | <chem>{[O=C]C(=O)COC(=O)[O]c1ccc(cc1)C2(CCCC2)c3cc(cc3)O[O]}</chem>                 | M32 |
| 30 | Phthaloyl Chloride     | Naphthalene-1,5-diol                         |      |       |      | 1:1 | <chem>{[O=C]c(cccc1)c1C(=O)[O]c1c(ccc2)c(ccc1)c2O[O]}</chem>                        | M32 |
| 31 | Phthaloyl Chloride     | 2,7-Naphthalenediol                          |      |       |      | 1:1 | <chem>{[O=C]c(cccc1)c1C(=O)[O]c1cc2c(cc1)ccc(c2)O[O]}</chem>                        | M32 |

Supplementary Dataset S4: Polymer Library Members

|    |                     |                                         |       |       |      |     |                                                                                                 |     |
|----|---------------------|-----------------------------------------|-------|-------|------|-----|-------------------------------------------------------------------------------------------------|-----|
| 32 | Phthaloyl Chloride  | Bisphenol A                             | 0.78  | 1.05  | 1.34 | 1:1 | <chem>O=C(Oc1ccc(cc1)C(C)(C)c2ccc(cc2)O)C(=O)c3ccc(cc3)C(C)(C)c4ccc(cc4)O</chem>                | M32 |
| 33 | Sebacoyl Chloride   | Bisphenol A                             | 5.54  | 5.94  | 1.07 | 1:1 | <chem>O=C(Oc1ccc(cc1)C(C)(C)c2ccc(cc2)O)CCCCCCCCC(=O)C(=O)c3ccc(cc3)C(C)(C)c4ccc(cc4)O</chem>   | M32 |
| 34 | Diglycolyl Chloride | 4,4'-(9-Fluorenylidene)diphenol         | 0.74  | 0.89  | 1.2  | 1:1 | <chem>O=C(Oc1ccc(cc1)C2(c3ccccc3c4c2ccccc4)c5ccc(cc5)O)C(=O)COC(=O)c6ccc(cc6)C2</chem>          | M32 |
| 35 | Diglycolyl Chloride | 4,4'-Thiodiphenol                       | 5.74  | 6.16  | 1.07 | 1:1 | <chem>O=C(Oc1ccc(cc1)Sc2ccc(cc2)O)C(=O)COC(=O)c3ccc(cc3)S</chem>                                | M32 |
| 36 | Diglycolyl Chloride | 2,2'-Thiodiethanol                      | 0.90  | 1.47  | 1.64 | 1:1 | <chem>O=C(OCCSCCO)C(=O)COC(=O)OCCSCCO</chem>                                                    | M32 |
| 37 | Sebacoyl Chloride   | 4,4'-Dihydroxydiphenylmethane           |       |       |      | 1:1 | <chem>O=C(Oc1ccc(cc1)Cc2ccc(cc2)O)CCCCCCCCC(=O)C(=O)c3ccc(cc3)C(C)(C)c4ccc(cc4)O</chem>         | M32 |
| 38 | Oxalyl Chloride     | 4,4'-(alpha-Methylbenzylidene)bisphenol | 4.30  | 3.11  | 2.12 | 1:1 | <chem>O=C(Oc1ccc(cc1)C(C)(C)c2ccc(cc2)c3ccc(cc3)O)C(=O)C(=O)c4ccc(cc4)C(C)(C)c5ccc(cc5)O</chem> | M32 |
| 39 | Diglycolyl Chloride | (R)-(+)-1,1'-Binaphthyl-2,2'-diol       |       |       |      | 1:1 | <chem>O=C(Oc1ccc(ccc2)C2c1c3c(cccc4)c4ccc3O)C(=O)COC(=O)c5ccc(cc5)C2</chem>                     | M32 |
| 40 | Diglycolyl Chloride | cis-2-Butene-1,4-diol                   | 10.33 | 13.00 | 1.26 | 1:1 | <chem>O=C(OCC=CCO)C(=O)COC(=O)OCC=CCO</chem>                                                    | M32 |
| 41 | Diglycolyl Chloride | Naphthalene-1,5-diol                    |       |       |      | 1:1 | <chem>O=C(Oc1ccc2c(c1)ccc(O)c2)C(=O)COC(=O)c3ccc4c(O)ccc(O)c43</chem>                           | M32 |
| 42 | Diglycolyl Chloride | 2,7-Naphthalenediol                     |       |       |      | 1:1 | <chem>O=C(Oc1cc2c(cc1)ccc(O)c2)C(=O)COC(=O)c3ccc4c(O)ccc(O)c43</chem>                           | M32 |
| 43 | Diglycolyl Chloride | 2-Hydroxyethyl disulfide                | 6.28  | 7.80  | 1.24 | 1:1 | <chem>O=C(OCCSSCCO)C(=O)COC(=O)OCCSSCCO</chem>                                                  | M32 |

Supplementary Dataset S4: Polymer Library Members

|    |                   |                                                               |     |                                                                   |     |
|----|-------------------|---------------------------------------------------------------|-----|-------------------------------------------------------------------|-----|
| 44 | Oxalyl Chloride   | 4,4'-Isopropylidenedicyclohexanol, mixture of isomers         | 1:1 | <chem>{[O=C]C(=O)[O]C(C1CC1)CCC1C(C)C(C)C(C2)CCC2O[O]}</chem>     | M32 |
| 45 | Oxalyl Chloride   | 1,4-dithiane-2,5-diol                                         | 1:1 | <chem>{[O=C]C(=O)[O]C(S1)SCC1O[O]}</chem>                         | M32 |
| 46 | Sebacoyl Chloride | 4,4'-Thiodiphenol                                             | 1:1 | <chem>{[O=C]C(=O)CCCCCCCC(=O)[O]c1ccc(cc1)Sc2ccc(cc2)O[O]}</chem> | M32 |
| 47 | Oxalyl Chloride   | 2,5-hexanediol(+isomers)                                      | 1:1 | <chem>{[O=C]C(=O)[O]C(C)CCC(C)O[O]}</chem>                        | M32 |
| 48 | Oxalyl Chloride   | 1,8-octanediol                                                | 1:1 | <chem>{[O=C]C(=O)[O]OCCCCCCCCO[O]}</chem>                         | M32 |
| 49 | Oxalyl Chloride   | 1,10-decanediol                                               | 1:1 | <chem>{[O=C]C(=O)[O]OCCCCCCCCCO[O]}</chem>                        | M32 |
| 50 | Oxalyl Chloride   | 2,2-diethyl-1,3-propanediol                                   | 1:1 | <chem>{[O=C]C(=O)[O]OCC(CC)(CC)CO[O]}</chem>                      | M32 |
| 51 | Oxalyl Chloride   | 4,8-Bis(hydroxymethyl)tricyclo[5.2.1.0 <sup>2,6</sup> ]decane | 1:1 | <chem>{[O=C]C(=O)[O]OCC(CC(C1)C2C3)C1C2CC3CO[O]}</chem>           | M32 |
| 52 | Malonyl Chloride  | 4,4'-Dihydroxydiphenylmethane                                 | 1:1 | <chem>{[O=C]C(=O)C(=O)[O]c1ccc(cc1)Cc2ccc(cc2)O[O]}</chem>        | M32 |
| 53 | Sebacoyl Chloride | 2,2'-Thiodiethanol                                            | 1:1 | <chem>{[O=C]C(=O)CCCCCCCC(=O)[O]OCCSCCO[O]}</chem>                | M32 |
| 54 | Sebacoyl Chloride | 1,4-dithiane-2,5-diol                                         | 1:1 | <chem>{[O=C]C(=O)CCCCCCCC(=O)[O]C(S1)SCC1O[O]}</chem>             | M32 |
| 55 | Oxalyl Chloride   | 2,7-Naphthalenediol                                           | 1:1 | <chem>{[O=C]C(=O)[O]c1cc2c(cc1)ccc(c2)O[O]}</chem>                | M32 |

Supplementary Dataset S4: Polymer Library Members

|    |                   |                                            |       |       |      |     |                                                                            |     |
|----|-------------------|--------------------------------------------|-------|-------|------|-----|----------------------------------------------------------------------------|-----|
| 56 | Sebacoyl Chloride | cis-2-Butene-1,4-diol                      |       |       |      | 1:1 | <chem>{[O]C(=O)CCCCCCCC(=O)[O]C/C=C/CO}</chem>                             | M32 |
| 57 | Succinyl Chloride | 4,4'-(alpha-Methylbenzylidene)bisphenol    |       |       |      | 1:1 | <chem>{[O]C(=O)CCC(=O)[O]Oc1ccc(cc1)C(C)(c2ccccc2)c3ccc(cc3)O}</chem>      | M32 |
| 58 | Succinyl Chloride | Bis(4-hydroxyphenyl) Sulfone               |       |       |      | 1:1 | <chem>{[O]C(=O)CCC(=O)[O]Oc1ccc(cc1)S(=O)(=O)c2ccc(cc2)O}</chem>           | M32 |
| 59 | Succinyl Chloride | 4,4'-Cyclohexylidenebisphenol              |       |       |      | 1:1 | <chem>{[O]C(=O)CCC(=O)[O]Oc1ccc(cc1)C2(CCCC2)c3ccc(cc3)O}</chem>           | M32 |
| 60 | Succinyl Chloride | 4,4'-Isopropylidenebis(2,6-dimethylphenol) |       |       |      | 1:1 | <chem>{[O]C(=O)CCC(=O)[O]Oc1c(C)cc(cc1(C))C(C)(C)c2cc(C)c(c(C)c2)O}</chem> | M32 |
| 61 | Succinyl Chloride | 4,4'-Thiodiphenol                          |       |       |      | 1:1 | <chem>{[O]C(=O)CCC(=O)[O]Oc1ccc(cc1)Sc2ccc(cc2)O}</chem>                   | M32 |
| 62 | Sebacoyl Chloride | Resorcinol                                 |       |       |      | 1:1 | <chem>{[O]C(=O)CCCCCCCC(=O)[O]Oc1ccc(O)c1}</chem>                          | M32 |
| 63 | Succinyl Chloride | Biphenyl-2,2'-diol                         |       |       |      | 1:1 | <chem>{[O]C(=O)CCC(=O)[O]Oc1ccc(O)c2ccccc12}</chem>                        | M32 |
| 64 | Succinyl Chloride | 4,4'-Sulfonylbis(2-methylphenol)           |       |       |      | 1:1 | <chem>{[O]C(=O)CCC(=O)[O]Oc1c(C)cc(cc1)S(=O)(=O)c2ccc(c(C)c2)O}</chem>     | M32 |
| 65 | Succinyl Chloride | (R)-(+)-1,1'-Binaphthyl-2,2'-diol          |       |       |      | 1:1 | <chem>{[O]C(=O)CCC(=O)[O]Oc1ccc(ccc2c2c1c3c(cccc4)c4ccc3O)}</chem>         | M32 |
| 66 | Succinyl Chloride | 2-Butyne-1,4-diol                          | 10.32 | 20.63 | 2.00 | 1:1 | <chem>{[O]C(=O)CCC(=O)[O]OCC#CCO}</chem>                                   | M32 |
| 67 | Succinyl Chloride | Dianhydro-D-glucitol                       |       |       |      | 1:1 | <chem>{[O]C(=O)CCC(=O)[O]OC(C1CO1)C(C2CO2)O}</chem>                        | M32 |

**Supplementary Dataset S4: Polymer Library Members**

|    |                       |                                              |     |                                                                                   |     |
|----|-----------------------|----------------------------------------------|-----|-----------------------------------------------------------------------------------|-----|
| 68 | Succinyl Chloride     | cis-2-Butene-1,4-diol                        | 1:1 | <chem>{[O=C]C(=O)CCC(=O)[O]C/C=C/CO}</chem>                                       | M32 |
| 69 | Succinyl Chloride     | Naphthalene-1,5-diol                         | 1:1 | <chem>{[O=C]C(=O)CCC(=O)Oc1c(ccc2)c(ccc1)c2O}</chem>                              | M32 |
| 70 | Succinyl Chloride     | 2,7-Naphthalenediol                          | 1:1 | <chem>{[O=C]C(=O)CCC(=O)Oc1cc2c(cc1)ccc(c2)O}</chem>                              | M32 |
| 71 | Sebacoyl Chloride     | Naphthalene-1,5-diol                         | 1:1 | <chem>{[O=C]C(=O)CCCCCCCC(=O)Oc1c(ccc2)c(ccc1)c2O}</chem>                         | M32 |
| 72 | Succinyl Chloride     | 2-Hydroxyethyl disulfide                     | 1:1 | <chem>{[O=C]C(=O)CCC(=O)OCCSSCCO}</chem>                                          | M32 |
| 73 | Isophthaloyl Chloride | Bisphenol A                                  | 1:1 | <chem>{[O=C]c(ccc1)cc1C(=O)Oc1ccc(cc1)C(C)(C)c2ccc(cc2)O}</chem>                  | M32 |
| 74 | Isophthaloyl Chloride | 1,3-Bis[2-(4-hydroxyphenyl)-2-propyl]benzene | 1:1 | <chem>{[O=C]c(ccc1)cc1C(=O)Oc1ccc(cc1)C(C)(C)c2ccc(cc2)C(C)(C)c3ccc(cc3)O}</chem> | M32 |
| 75 | Isophthaloyl Chloride | 4,4'-(alpha-Methylbenzylidene)bisphenol      | 1:1 | <chem>{[O=C]c(ccc1)cc1C(=O)Oc1ccc(cc1)C(C)(c2ccccc2)c3ccc(cc3)O}</chem>           | M32 |
| 76 | Isophthaloyl Chloride | Bis(4-hydroxyphenyl) Sulfone                 | 1:1 | <chem>{[O=C]c(ccc1)cc1C(=O)Oc1ccc(cc1)S(=O)(=O)c2ccc(cc2)O}</chem>                | M32 |
| 77 | Isophthaloyl Chloride | 4,4'-Cyclohexylidenebisphenol                | 1:1 | <chem>{[O=C]c(ccc1)cc1C(=O)Oc1ccc(cc1)C2(CCCC2)c3cc(cc3)O}</chem>                 | M32 |
| 78 | Isophthaloyl Chloride | 4,4'-Isopropylidenebis(2,6-dimethylphenol)   | 1:1 | <chem>{[O=C]c(ccc1)cc1C(=O)Oc1c(C)cc(cc1(C))C(C)(C)c2cc(C)c(c(C)c2)O}</chem>      | M32 |

Supplementary Dataset S4: Polymer Library Members

|    |                        |                                   |     |                                                                           |     |
|----|------------------------|-----------------------------------|-----|---------------------------------------------------------------------------|-----|
| 79 | Sebacoyl Chloride      | 2,7-Naphthalenediol               | 1:1 | <chem>{O=C(O)CCCCCCCC(=O)Oc1cc2c(cc1)ccc(c2)O}</chem>                     | M32 |
| 80 | Isophthaloyl Chloride  | 4,4'-Thiodiphenol                 | 1:1 | <chem>{O=C(O)c(ccc1)cc1C(=O)Oc1ccc(cc1)Sc2ccc(cc2)O}</chem>               | M32 |
| 81 | Isophthaloyl Chloride  | 4,4'-Sulfonylbis(2-methylphenol)  | 1:1 | <chem>{O=C(O)c(ccc1)cc1C(=O)Oc1c(C)cc(cc1)S(=O)(=O)c2ccc(c(C)c2)O}</chem> | M32 |
| 82 | Isophthaloyl Chloride  | (R)-(+)-1,1'-Binaphthyl-2,2'-diol | 1:1 | <chem>{O=C(O)c(ccc1)cc1C(=O)Oc1ccc(ccc2)c2c1c3c(cccc4)c4ccc3O}</chem>     | M32 |
| 83 | Sebacoyl Chloride      | 2-Butyne-1,4-diol                 | 1:1 | <chem>{O=C(O)CCCCCCCC(=O)OCC#CCO}</chem>                                  | M32 |
| 84 | Isophthaloyl Chloride  | Dianhydro-D-glucitol              | 1:1 | <chem>{O=C(O)c(ccc1)cc1C(=O)OC(C1CO1)C(C2CO2)O}</chem>                    | M32 |
| 85 | Isophthaloyl Chloride  | cis-2-Butene-1,4-diol             | 1:1 | <chem>{O=C(O)c(ccc1)cc1C(=O)OC/C=C/O}</chem>                              | M32 |
| 86 | Isophthaloyl Chloride  | Resorcinol                        | 1:1 | <chem>{O=C(O)c(ccc1)cc1C(=O)Oc1cccc(c1)O}</chem>                          | M32 |
| 87 | Isophthaloyl Chloride  | Naphthalene-1,5-diol              | 1:1 | <chem>{O=C(O)c(ccc1)cc1C(=O)Oc1c(ccc2)ccc1c2O}</chem>                     | M32 |
| 88 | Isophthaloyl Chloride  | 2,7-Naphthalenediol               | 1:1 | <chem>{O=C(O)c(ccc1)cc1C(=O)Oc1cc2c(cc1)ccc(c2)O}</chem>                  | M32 |
| 89 | Terephthaloyl chloride | 3-methyl-1,5-pentanediol          | 1:1 | <chem>{O=C(O)c1ccc(cc1)C(=O)OCC(C)CO}</chem>                              | M32 |



Supplementary Dataset S4: Polymer Library Members

|     |                       |                                              |      |      |      |     |                                                                                  |     |
|-----|-----------------------|----------------------------------------------|------|------|------|-----|----------------------------------------------------------------------------------|-----|
| 90  | Sebacoyl Chloride     | 1,3-Bis[2-(4-hydroxyphenyl)-2-propyl]benzene | 5.66 | 6.68 | 1.18 | 1:1 | <chem>{[O=C]CCCCCCCC(=O)[O]c1ccc(cc1)C(C)(C)c2ccc(cc2)C(C)(C)c3ccc(cc3)O}</chem> | M32 |
| 91  | Adipoyl Chloride      | Naphthalene-1,5-diol                         |      |      |      | 1:1 | <chem>{[O=C]CCCC(=O)[O]c1c(ccc2)c(ccc1)c2O}</chem>                               | M32 |
| 92  | Adipoyl Chloride      | 2,7-Naphthalenediol                          |      |      |      | 1:1 | <chem>{[O=C]CCCC(=O)[O]c1cc2c(cc1)cc(c2)O}</chem>                                | M32 |
| 93  | Adipoyl Chloride      | Guaiacol glyceryl ether                      | 6.08 | 7.65 | 1.26 | 1:1 | <chem>{[O=C]CCCC(=O)[O]COC(CCC1)C1OC}O</chem>                                    | M32 |
| 94  | Adipoyl Chloride      | Bis(4-hydroxyphenyl) Sulfone                 |      |      |      | 1:1 | <chem>{[O=C]CCCC(=O)[O]c1ccc(cc1)S(=O)(=O)c2ccc(cc2)O}</chem>                    | M32 |
| 95  | Sebacoyl Chloride     | 4,4'-(alpha-Methylbenzylidene)bisphenol      | 4.69 | 5.49 | 1.17 | 1:1 | <chem>{[O=C]CCCCCCCC(=O)[O]c1ccc(cc1)C(C)(c2ccccc2)c3ccc(cc3)O}</chem>           | M32 |
| 96  | Isophthaloyl Chloride | 2,5-dimethyl-3-hexyne-2,5-diol               |      |      |      | 1:1 | <chem>{[O=C]c(ccc1)cc1C(=O)[O]C(C)(C)C#C(C)(C)O}</chem>                          | M32 |
| 97  | Sebacoyl Chloride     | 2,5-dimethyl-3-hexyne-2,5-diol               |      |      |      | 1:1 | <chem>{[O=C]CCCCCCCC(=O)[O]C(C)(C)C#C(C)(C)O}</chem>                             | M32 |
| 98  | Adipoyl Chloride      | 2,2'-Thiodiethanol                           |      |      |      | 1:1 | <chem>{[O=C]CCCC(=O)[O]CSCCO}</chem>                                             | M32 |
| 99  | Adipoyl Chloride      | 1,4-Dithiane-2,5-diol                        |      |      |      | 1:1 | <chem>{[O=C]CCCC(=O)[O]C(CS1)SCC1O}</chem>                                       | M32 |
| 100 | Adipoyl Chloride      | cis-2-Butene-1,4-diol                        |      |      |      | 1:1 | <chem>{[O=C]CCCC(=O)[O]C/C=C/CO}</chem>                                          | M32 |
| 101 | Adipoyl Chloride      | Resorcinol                                   |      |      |      | 1:1 | <chem>{[O=C]CCCC(=O)[O]c1ccc(c1)O}</chem>                                        | M32 |

Supplementary Dataset S4: Polymer Library Members

|     |                   |                                              |      |       |      |     |                                                                                |     |
|-----|-------------------|----------------------------------------------|------|-------|------|-----|--------------------------------------------------------------------------------|-----|
| 102 | Adipoyl Chloride  | Biphenyl-2,2'-diol                           | 9.56 | 14.04 | 1.47 | 1:1 | <chem>{O=C(O)CCCCC(=O)Oc1ccc(cc1)c2cc(ccc2)O}</chem>                           | M32 |
| 103 | Malonyl Chloride  | Bis(4-hydroxyphenyl) Sulfone                 |      |       |      | 1:1 | <chem>{O=C(O)CC(=O)Oc1ccc(cc1)S(=O)(=O)c2ccc(cc2)O}</chem>                     | M32 |
| 104 | Sebacoyl Chloride | 4,4'-(9-Fluorenylidene)di phenol             | 4.88 | 5.79  | 1.19 | 1:1 | <chem>{O=C(O)CCCCCCCCC(=O)Oc1ccc(cc1)C2(c3ccccc3c4c2ccccc4)c5ccc(cc5)O}</chem> | M32 |
| 105 | Adipoyl Chloride  | 4,4'-Sulfonylbis(2-methylphenol)             |      |       |      | 1:1 | <chem>{O=C(O)CCCCC(=O)Oc1c(C)cc(cc1)S(=O)(=O)c2ccc(c(C)c2)O}</chem>            | M32 |
| 106 | Adipoyl Chloride  | Bisphenol A                                  | 9.42 | 14.00 | 1.49 | 1:1 | <chem>{O=C(O)CCCCC(=O)Oc1ccc(cc1)C(C)(C)c2ccc(cc2)O}</chem>                    | M32 |
| 107 | Adipoyl Chloride  | 1,3-Bis[2-(4-hydroxyphenyl)-2-propyl]benzene |      |       |      | 1:1 | <chem>{O=C(O)CCCCC(=O)Oc1ccc(cc1)C(C)(C)c2ccc(cc2)C(C)(C)c3ccc(cc3)O}</chem>   | M32 |
| 108 | Adipoyl Chloride  | 4,4'-Isopropylidenebis(2,6-dimethylphenol)   |      |       |      | 1:1 | <chem>{O=C(O)CCCCC(=O)Oc1c(C)cc(cc1(C))C(C)(C)c2cc(C)c(c(C)c2)O}</chem>        | M32 |
| 109 | Adipoyl Chloride  | 4,4'-(alpha-Methylbenzylidene)bisphenol      |      |       |      | 1:1 | <chem>{O=C(O)CCCCC(=O)Oc1ccc(cc1)C(C)(c2ccccc2)c3ccc(cc3)O}</chem>             | M32 |
| 110 | Adipoyl Chloride  | 4,4'-Cyclohexylidenebisphenol                |      |       |      | 1:1 | <chem>{O=C(O)CCCCC(=O)Oc1ccc(cc1)C2(CCCC2)c3cc(cc3)O}</chem>                   | M32 |
| 111 | Adipoyl Chloride  | Bis(4-hydroxyphenyl) Sulfone                 |      |       |      | 1:1 | <chem>{O=C(O)CCCCC(=O)Oc1ccc(cc1)S(=O)(=O)c2ccc(cc2)O}</chem>                  | M32 |

Supplementary Dataset S4: Polymer Library Members

|     |                        |                               |      |      |      |     |                                                                |     |
|-----|------------------------|-------------------------------|------|------|------|-----|----------------------------------------------------------------|-----|
| 112 | Adipoyl Chloride       | 2-Butyne-1,4-diol             | 8.64 | 9.54 | 1.10 | 1:1 | <chem>{O=C}CCCCC(=O)OCC#CCO</chem>                             | M32 |
| 113 | Adipoyl Chloride       | 4,4'-Thiodiphenol             |      |      |      | 1:1 | <chem>{O=C}CCCCC(=O)Oc1ccc(cc1)Sc2ccc(cc2)O</chem>             | M32 |
| 114 | Sebacoyl Chloride      | Dianhydro-D-glucitol          |      |      |      | 1:1 | <chem>{O=C}CCCCCCCCC(=O)OC(C1CO1)C(C2CO2)O</chem>              | M32 |
| 115 | Sebacoyl Chloride      | Guaiacol glyceryl ether       | 6.15 | 8.26 | 1.34 | 1:1 | <chem>{O=C}CCCCCCCCC(=O)OCC(COC(CCCC1)C1OC)O</chem>            | M32 |
| 116 | Sebacoyl Chloride      | Bis(4-hydroxyphenyl) Sulfone  |      |      |      | 1:1 | <chem>{O=C}CCCCCCCCC(=O)Oc1ccc(cc1)S(=O)(=O)c2ccc(cc2)O</chem> | M32 |
| 117 | Terephthaloyl Chloride | tripropylene glycol           |      |      |      | 1:1 | <chem>{O=C}c1ccc(cc1)C(=O)OC(C)COC(C)COC(C)CO</chem>           | M32 |
| 118 | Terephthaloyl Chloride | Resorcinol                    |      |      |      | 1:1 | <chem>{O=C}c1ccc(cc1)C(=O)Oc1cccc(c1)O</chem>                  | M32 |
| 119 | Terephthaloyl Chloride | Naphthalene-1,5-diol          |      |      |      | 1:1 | <chem>{O=C}c1ccc(cc1)C(=O)Oc1c(ccc2)c(ccc1)c2O</chem>          | M32 |
| 120 | Terephthaloyl Chloride | 2,7-Naphthalenediol           |      |      |      | 1:1 | <chem>{O=C}c1ccc(cc1)C(=O)Oc1cc2c(cc1)ccc(c2)O</chem>          | M32 |
| 121 | Terephthaloyl Chloride | 2-Butyne-1,4-diol             |      |      |      | 1:1 | <chem>{O=C}c1ccc(cc1)C(=O)OCC#CCO</chem>                       | M32 |
| 122 | Terephthaloyl Chloride | Bisphenol A                   |      |      |      | 1:1 | <chem>{O=C}c1ccc(cc1)C(=O)Oc1ccc(cc1)C(C)(C)c2ccc(cc2)O</chem> | M32 |
| 123 | Terephthaloyl Chloride | 4,4'-Dihydroxydiphenylmethane |      |      |      | 1:1 | <chem>{O=C}c1ccc(cc1)C(=O)Oc1ccc(cc1)Cc2ccc(cc2)O</chem>       | M32 |

Supplementary Dataset S4: Polymer Library Members

|     |                        |                                   |      |      |      |     |                                                                  |     |
|-----|------------------------|-----------------------------------|------|------|------|-----|------------------------------------------------------------------|-----|
| 124 | Terephthaloyl Chloride | Bis(4-hydroxyphenyl) Sulfone      |      |      |      | 1:1 | <chem>O=C1C=CC(=O)C=C1OS(=O)(=O)C2=CC=CC=C2O</chem>              | M32 |
| 125 | Terephthaloyl Chloride | 4,4'-Thiodiphenol                 |      |      |      | 1:1 | <chem>O=C1C=CC(=O)C=C1OSc2ccc(cc2)O</chem>                       | M32 |
| 126 | Terephthaloyl Chloride | Guaiacol glyceryl ether           | 5.57 | 6.44 | 1.16 | 1:1 | <chem>O=C1C=CC(=O)C=C1OCC(COC(CCCC1)C1OC)O</chem>                | M32 |
| 127 | Terephthaloyl Chloride | 2,2'-Thiodiethanol                |      |      |      | 1:1 | <chem>O=C1C=CC(=O)C=C1OCCSCCO</chem>                             | M32 |
| 128 | Terephthaloyl Chloride | 1,4-dithiane-2,5-diol             |      |      |      | 1:1 | <chem>O=C1C=CC(=O)C=C1OC(CS1)SCC1O</chem>                        | M32 |
| 129 | Terephthaloyl Chloride | Dianhydro-D-glucitol              |      |      |      | 1:1 | <chem>O=C1C=CC(=O)C=C1OC(C1CO1)C(C2CO2)O</chem>                  | M32 |
| 130 | Malonyl Chloride       | 4,4'-Thiodiphenol                 |      |      |      | 1:1 | <chem>O=C(C)C(=O)Oc1ccc(cc1)Sc2ccc(cc2)O</chem>                  | M32 |
| 131 | Terephthaloyl Chloride | cis-2-Butene-1,4-diol             |      |      |      | 1:1 | <chem>O=C1C=CC(=O)C=C1OC/C=C/COC</chem>                          | M32 |
| 132 | Sebacoyl Chloride      | 4,4'-Cyclohexylidenebisphenol     |      |      |      | 1:1 | <chem>O=C1CCCCCCCC(=O)C=C1Oc1ccc(cc1)C2(CCCCC2)c3cc(cc3)O</chem> | M32 |
| 133 | Sebacoyl Chloride      | (R)-(+)-1,1'-Binaphthyl-2,2'-diol | 0.91 | 1.36 | 1.48 | 1:1 | <chem>O=C1CCCCCCCC(=O)C=C1Oc1ccc(cc1)c2c1c3c(ccc4)c4ccc3O</chem> | M32 |

Supplementary Dataset S4: Polymer Library Members

|     |                   |                                  |      |      |      |     |                                                                          |     |
|-----|-------------------|----------------------------------|------|------|------|-----|--------------------------------------------------------------------------|-----|
| 134 | Sebacoyl Chloride | 4,4'-Sulfonylbis(2-methylphenol) | 4.44 | 4.67 | 1.05 | 1:1 | <chem>{O=C(O)CCCCCCCC(=O)Oc1c(C)c(c(cc1)S(=O)(=O)c2ccc(c(C)c2)O)}</chem> | M32 |
| 135 | Azelaoyl chloride | Bisphenol A                      | 1.29 | 1.92 | 1.49 | 1:1 | <chem>{O=C(O)CCCCCCCC(=O)Oc1ccc(cc1)C(C)(C)c2ccc(cc2)O}</chem>           | M32 |
| 136 | Azelaoyl chloride | 4,4'-Dihydroxydiphenylmethane    |      |      |      | 1:1 | <chem>{O=C(O)CCCCCCCC(=O)Oc1ccc(cc1)Cc2ccc(cc2)O}</chem>                 | M32 |
| 137 | Azelaoyl chloride | 4,4'-Thiodiphenol                |      |      |      | 1:1 | <chem>{O=C(O)CCCCCCCC(=O)Oc1ccc(cc1)Sc2ccc(cc2)O}</chem>                 | M32 |
| 138 | Azelaoyl chloride | 1,4-dithiane-2,5-diol            |      |      |      | 1:1 | <chem>{O=C(O)CCCCCCCC(=O)OC(CS1)SCC1O}</chem>                            | M32 |
| 139 | Azelaoyl chloride | cis-2-Butene-1,4-diol            |      |      |      | 1:1 | <chem>{O=C(O)CCCCCCCC(=O)OC/C=C/O}</chem>                                | M32 |
| 140 | Azelaoyl chloride | Resorcinol                       | 1.15 | 1.65 | 1.43 | 1:1 | <chem>{O=C(O)CCCCCCCC(=O)Oc1ccc(c1)O}</chem>                             | M32 |
| 141 | Azelaoyl chloride | Naphthalene-1,5-diol             |      |      |      | 1:1 | <chem>{O=C(O)CCCCCCCC(=O)Oc1c(ccc2)c(ccc1)c2O}</chem>                    | M32 |
| 142 | Azelaoyl chloride | 2,7-Naphthalenediol              |      |      |      | 1:1 | <chem>{O=C(O)CCCCCCCC(=O)Oc1cc2c(c1)ccc(c2)O}</chem>                     | M32 |
| 143 | Azelaoyl chloride | 2-Butyne-1,4-diol                | 2.37 | 3.56 | 1.50 | 1:1 | <chem>{O=C(O)CCCCCCCC(=O)OCC#CCO}</chem>                                 | M32 |
| 144 | Azelaoyl chloride | Guaiacol glyceryl ether          | 1.67 | 2.35 | 1.41 | 1:1 | <chem>{O=C(O)CCCCCCCC(=O)OCC(COC(CCCC1)C1OC)O}</chem>                    | M32 |

Supplementary Dataset S4: Polymer Library Members

|     |                   |                                              |      |      |      |     |                                                                                       |     |
|-----|-------------------|----------------------------------------------|------|------|------|-----|---------------------------------------------------------------------------------------|-----|
| 145 | Azelaoyl chloride | Bis(4-hydroxyphenyl) Sulfone                 |      |      |      | 1:1 | <chem>{[O=C]C(=O)CCCCCCCC(=O)[O]c1ccc(cc1)S(=O)(=O)c2ccc(cc2)O}</chem>                | M32 |
| 146 | Azelaoyl chloride | Biphenyl-2,2'-diol                           | 4.27 | 6.08 | 3.04 | 1:1 | <chem>{[O=C]C(=O)CCCCCCCC(=O)[O]c(ccc1)c1c2c(ccc2)O}</chem>                           | M32 |
| 147 | Azelaoyl chloride | 1,3-Bis[2-(4-hydroxyphenyl)-2-propyl]benzene | 1.52 | 2.53 | 1.67 | 1:1 | <chem>{[O=C]C(=O)CCCCCCCC(=O)[O]c1ccc(cc1)C(C)(C)c2ccc(cc2)C(C)(C)c3ccc(cc3)O}</chem> | M32 |
| 148 | Azelaoyl chloride | 4,4'-(alpha-Methylbenzylidene)bisphenol      | 1.77 | 2.16 | 1.22 | 1:1 | <chem>{[O=C]C(=O)CCCCCCCC(=O)[O]c1ccc(cc1)C(C)(c2ccccc2)c3ccc(cc3)O}</chem>           | M32 |
| 149 | Azelaoyl chloride | 4,4'-Isopropylidenebis(2,6-dimethylphenol)   | 2.02 | 2.35 | 1.17 | 1:1 | <chem>{[O=C]C(=O)CCCCCCCC(=O)[O]c1c(C)cc(cc1(C))C(C)(C)c2cc(C)c(c(C)c2)O}</chem>      | M32 |
| 150 | Azelaoyl chloride | 4,4'-(9-Fluorenylidene)di phenol             | 1.36 | 1.50 | 1.10 | 1:1 | <chem>{[O=C]C(=O)CCCCCCCC(=O)[O]c1ccc(cc1)C2(c3ccccc3c4c2ccccc4)c5ccc(cc5)O}</chem>   | M32 |
| 151 | Azelaoyl chloride | (R)-(+)-1,1'-Binaphthyl-2,2'-diol            | 0.56 | 0.79 | 1.41 | 1:1 | <chem>{[O=C]C(=O)CCCCCCCC(=O)[O]c1ccc(cc2)c2c1c3c(ccc4)c4ccc3O}</chem>                | M32 |
| 152 | Suberoyl chloride | Bisphenol A                                  |      |      |      | 1:1 | <chem>{[O=C]C(=O)CCCCCCC(=O)[O]c1ccc(cc1)C(C)(C)c2ccc(cc2)O}</chem>                   | M32 |
| 153 | Suberoyl chloride | 4,4'-Dihydroxydiphenylmethane                |      |      |      | 1:1 | <chem>{[O=C]C(=O)CCCCCCC(=O)[O]c1ccc(cc1)Cc2ccc(cc2)O}</chem>                         | M32 |
| 154 | Suberoyl chloride | 4,4'-Thiodiphenol                            |      |      |      | 1:1 | <chem>{[O=C]C(=O)CCCCCCC(=O)[O]c1ccc(cc1)Sc2ccc(cc2)O}</chem>                         | M32 |

**Supplementary Dataset S4: Polymer Library Members**

|     |                          |                       |      |      |      |     |                                                                  |     |
|-----|--------------------------|-----------------------|------|------|------|-----|------------------------------------------------------------------|-----|
| 155 | Malonyl Chloride         | 1,4-dithiane-2,5-diol |      |      |      | 1:1 | <chem>{[O=C]C(=O)CC(=O)[O]OC(CS1)SCC1O}</chem>                   | M32 |
| 156 | Suberoyl chloride        | 1,4-dithiane-2,5-diol |      |      |      | 1:1 | <chem>{[O=C]C(=O)CCCCCCC(=O)[O]OC(CS1)SCC1O}</chem>              | M32 |
| 157 | Suberoyl chloride        | Resorcinol            | 1.34 | 2.45 | 1.83 | 1:1 | <chem>{[O=C]C(=O)CCCCCCC(=O)[O]Oc1cccc(c1)O}</chem>              | M32 |
| 158 | Suberoyl chloride        | Naphthalene-1,5-diol  |      |      |      | 1:1 | <chem>{[O=C]C(=O)CCCCCCC(=O)[O]Oc1c(ccc2)ccc1c2O}</chem>         | M32 |
| 159 | Suberoyl chloride        | 2,7-Naphthalenediol   |      |      |      | 1:1 | <chem>{[O=C]C(=O)CCCCCCC(=O)[O]Oc1cc2c(cc1)ccc(c2)O}</chem>      | M32 |
| 160 | Dimethylmalonyl chloride | Bisphenol A           |      |      |      | 1:1 | <chem>{[O=C]C(C)(C)C(=O)[O]Oc1ccc(cc1)C(C)(C)c2ccc(cc2)O}</chem> | M32 |
| 161 | Dimethylmalonyl chloride | Biphenyl-2,2'-diol    |      |      |      | 1:1 | <chem>{[O=C]C(C)(C)C(=O)[O]Oc(ccc1)c1c2c(ccc2)O}</chem>          | M32 |
| 162 | Dimethylmalonyl chloride | 4,4'-Thiodiphenol     |      |      |      | 1:1 | <chem>{[O=C]C(C)(C)C(=O)[O]Oc1ccc(cc1)Sc2ccc(cc2)O}</chem>       | M32 |
| 163 | Dimethylmalonyl chloride | cis-2-Butene-1,4-diol |      |      |      | 1:1 | <chem>{[O=C]C(=O)C(C)(C)C(=O)[O]OC/C=C/CO}</chem>                | M32 |
| 164 | Dimethylmalonyl chloride | Naphthalene-1,5-diol  |      |      |      | 1:1 | <chem>{[O=C]C(=O)C(C)(C)C(=O)[O]Oc1c(ccc2)ccc1c2O}</chem>        | M32 |
| 165 | Terephthaloyl Chloride   | Biphenyl-2,2'-diol    |      |      |      | 1:1 | <chem>{[O=C]c1ccc(cc1)C(=O)[O]Oc(ccc1)c1c2c(ccc2)O}</chem>       | M32 |
| 166 | Terephthaloyl Chloride   | 1,3-Propanediol       |      |      |      | 1:1 | <chem>{[O=C]C(=O)c1ccc(cc1)C(=O)[O]OCCCO}</chem>                 | M32 |
| 167 | Terephthaloyl Chloride   | 1,5-pentanediol       |      |      |      | 1:1 | <chem>{[O=C]C(=O)c1ccc(cc1)C(=O)[O]OCCCCO}</chem>                | M32 |

Supplementary Dataset S4: Polymer Library Members

|     |                        |                                                               |       |       |      |     |                                                                          |     |
|-----|------------------------|---------------------------------------------------------------|-------|-------|------|-----|--------------------------------------------------------------------------|-----|
| 168 | Dimethylcarbo-<br>nate | 1,3-Bis[2-(4-<br>hydroxyphenyl)-<br>2-propyl]benzene          |       |       |      | 1:1 | <chem>{[O=C]C(=O)[O]c1ccc(cc1)C(C)(C)c2ccc(c2)C(C)(C)c3ccc(cc3)O}</chem> | M27 |
| 169 | Dimethylcarbo-<br>nate | cis-2-Butene-1,4-<br>diol                                     |       |       |      | 1:1 | <chem>{[O=C]C(=O)OC/C=C/CO}</chem>                                       | M27 |
| 170 | Dimethylcarbo-<br>nate | 1,3-Propanediol                                               |       |       |      | 1:1 | <chem>{[O=C]C(=O)OCCCO}</chem>                                           | M27 |
| 171 | Dimethylcarbo-<br>nate | 1,5-pentanediol                                               | 10.49 | 14.15 | 1.35 | 1:1 | <chem>{[O=C]C(=O)OCCCCO}</chem>                                          | M27 |
| 172 | Dimethylcarbo-<br>nate | 1,8-octanediol                                                | 1.65  | 2.87  | 1.74 | 1:1 | <chem>{[O=C]C(=O)OCCCCCCCCO}</chem>                                      | M28 |
| 173 | Dimethylcarbo-<br>nate | 1,9-nonanediol                                                | 1.92  | 3.19  | 1.66 | 1:1 | <chem>{[O=C]C(=O)OCCCCCCCCCO}</chem>                                     | M27 |
| 174 | Dimethylcarbo-<br>nate | 1,10-decanediol                                               | 1.82  | 2.92  | 1.61 | 1:1 | <chem>{[O=C]C(=O)OCCCCCCCCCO}</chem>                                     | M27 |
| 175 | Dimethylcarbo-<br>nate | 4,4'-(alpha-<br>Methylbenzyliden<br>e)bisphenol               | 2.16  | 2.19  | 1.01 | 1:1 | <chem>{[O=C]C(=O)Oc1ccc(cc1)C(C)(c2ccccc2)c3ccc(cc3)O}</chem>            | M28 |
| 176 | Dimethylcarbo-<br>nate | 2,2-diethyl-1,3-<br>propanediol                               | 1.13  | 1.83  | 1.61 | 1:1 | <chem>{[O=C]C(=O)OCC(CC)(CC)CO}</chem>                                   | M27 |
| 177 | Dimethylcarbo-<br>nate | 2,2-Dimethyl-1,3-<br>propanediol                              | 3.31  | 6.30  | 1.90 | 1:1 | <chem>{[O=C]C(=O)OCC(C)(C)CO}</chem>                                     | M28 |
| 178 | Dimethylcarbo-<br>nate | 4,8-<br>Bis(hydroxymeth-<br>yl)tricyclo[5.2.1.0<br>2,6]decane |       |       |      | 1:1 | <chem>{[O=C]C(=O)OCC(CC(C1)C2C3)C1C2C3CO}</chem>                         | M28 |
| 179 | Dimethylcarbo-<br>nate | 1,4-<br>cyclohexanediol                                       |       |       |      | 1:1 | <chem>{[O=C]C(=O)OC(CC1)CCC1O}</chem>                                    | M27 |
| 180 | Dimethylcarbo-<br>nate | diethylene glycol                                             |       |       |      | 1:1 | <chem>{[O=C]C(=O)OCCOCCO}</chem>                                         | M28 |
| 181 | Dimethylcarbo-<br>nate | 4,4'-<br>Sulfonylbis(2-<br>methylphenol)                      |       |       |      | 1:1 | <chem>{[O=C]C(=O)Oc1c(C)cc(cc1)S(=O)(=O)c2ccc(c(C)c2)O}</chem>           | M29 |
| 182 | Dimethylcarbo-<br>nate | 2-Hydroxyethyl<br>disulfide                                   |       |       |      | 1:1 | <chem>{[O=C]C(=O)OCCSSCO}</chem>                                         | M29 |



Supplementary Dataset S4: Polymer Library Members

|     |                   |                                                       |      |      |      |     |                                                                  |     |
|-----|-------------------|-------------------------------------------------------|------|------|------|-----|------------------------------------------------------------------|-----|
| 183 | Dimethylcarbonate | 4,4'-Isopropylidenedicyclohexanol, mixture of isomers |      |      |      | 1:1 | <chem>{[O=C]OC(CC1)CCC1C(C)(C)C(C2)CCC2O}</chem>                 | M27 |
| 184 | Dimethylcarbonate | dipropylene glycol                                    | 4.52 | 5.04 | 1.12 | 1:1 | <chem>{[O=C]OCC(C)OCC(C)O}</chem>                                | M27 |
| 185 | Dimethylcarbonate | Naphthalene-1,5-diol                                  |      |      |      | 1:1 | <chem>{[O=C]Oc1c(ccc2)c(ccc1)c2O}</chem>                         | M27 |
| 186 | Dimethylcarbonate | 2,7-Naphthalenediol                                   |      |      |      | 1:1 | <chem>{[O=C]Oc1cc2c(cc1)ccc(c2)O}</chem>                         | M27 |
| 187 | Dimethylcarbonate | 2-Butyne-1,4-diol                                     |      |      |      | 1:1 | <chem>{[O=C]OCC#CCO}</chem>                                      | M27 |
| 188 | Dimethylcarbonate | Bisphenol A                                           |      |      |      | 1:1 | <chem>{[O=C]Oc1ccc(cc1)C(C)(C)c2ccc(c2)O}</chem>                 | M29 |
| 189 | Dimethylcarbonate | 4,4'-Dihydroxydiphenylmethane                         |      |      |      | 1:1 | <chem>{[O=C]Oc1ccc(cc1)Cc2ccc(cc2)O}</chem>                      | M29 |
| 191 | Dimethylcarbonate | 4,4'-(9-Fluorenylidene)diphenol                       | 2.14 | 2.16 | 1.01 | 1:1 | <chem>{[O=C]Oc1ccc(cc1)C2(c3ccccc3c4c2ccccc4)c5ccc(cc5)O}</chem> | M27 |
| 192 | Dimethylcarbonate | 1,4-Butanediol                                        | 1.67 | 2.76 | 1.66 | 1:1 | <chem>{[O=C]OCCCCO}</chem>                                       | M29 |
| 193 | Dimethylcarbonate | 1,6-Hexanediol                                        | 3.68 | 7.70 | 2.09 | 1:1 | <chem>{[O=C]OCCCCCO}</chem>                                      | M29 |
| 194 | Dimethylcarbonate | 2-Methyl-1,3-propanediol                              | 2.00 | 3.04 | 1.52 | 1:1 | <chem>{[O=C]OCC(C)CO}</chem>                                     | M29 |
| 195 | Dimethylcarbonate | 2-Butyl-2-ethyl-1,3-propanediol                       | 2.28 | 3.54 | 1.55 | 1:1 | <chem>{[O=C]OCC(CC)(CCCC)CO}</chem>                              | M29 |
| 196 | dimethylcarbonate | 1,5-hexadiene-3,5-diol                                |      |      |      | 1:1 | <chem>{[O=C]OC(C=C)C(C=C)O}</chem>                               | M30 |
| 197 | Dimethylcarbonate | 4,4'-Cyclohexylidenebisphenol                         | 1.84 | 1.88 | 1.02 | 1:1 | <chem>{[O=C]Oc1ccc(cc1)C2(CCCC2)c3cc(cc3)O}</chem>               | M27 |

Supplementary Dataset S4: Polymer Library Members

|     |                       |                                           |       |       |      |     |                                                              |     |
|-----|-----------------------|-------------------------------------------|-------|-------|------|-----|--------------------------------------------------------------|-----|
| 198 | Dimethylcarbo<br>nate | (R)-(+)-1,1'-<br>Binaphthyl-2,2'-<br>diol |       |       |      | 1:1 | <chem>{[O=C]C(=O)[O]c1ccc(ccc2)c2c1c3c(cccc4)c4ccc3O}</chem> | M28 |
| 199 | Dimethylcarbo<br>nate | 4,4'-Thiodiphenol                         | 2.55  | 2.56  | 1.01 | 1:1 | <chem>{[O=C]C(=O)[O]c1ccc(cc1)Sc2ccc(cc2)O}</chem>           | M27 |
| 200 | Dimethylcarbo<br>nate | Guaiacol glyceryl<br>ether                |       |       |      | 1:1 | <chem>{[O=C]C(=O)[O]COC(CCC1)C1OC}</chem>                    | M28 |
| 201 | Dimethylcarbo<br>nate | 2,2'-<br>Thiodiethanol                    |       |       |      | 1:1 | <chem>{[O=C]C(=O)[O]CSCCO}</chem>                            | M28 |
| 202 | Diglycolic acid       | ethylene glycol                           |       |       |      | 1:1 | <chem>{[O=C]C(=O)COC(=O)[O]COC(=O)[O]}</chem>                | M25 |
| 203 | Diglycolic acid       | 1,10-decanediol                           | 7.88  | 27.97 | 3.55 | 1:1 | <chem>{[O=C]C(=O)COC(=O)[O]OCCCCCCCCCO}</chem>               | M25 |
| 204 | Diglycolic acid       | 1,2-Propanediol                           | 6.50  | 11.68 | 1.80 | 1:1 | <chem>{[O=C]C(=O)COC(=O)[O]C(C)O}</chem>                     | M25 |
| 205 | Diglycolic acid       | 1,3-Propanediol                           | 14.56 | 19.47 | 1.34 | 1:1 | <chem>{[O=C]C(=O)COC(=O)[O]COCO}</chem>                      | M25 |
| 206 | Diglycolic acid       | 1,4-Butanediol                            |       |       |      | 1:1 | <chem>{[O=C]C(=O)COC(=O)[O]OCCCCO}</chem>                    | M25 |
| 207 | Diglycolic acid       | 1,5-pentanediol                           | 5.19  | 10.20 | 1.97 | 1:1 | <chem>{[O=C]C(=O)COC(=O)[O]OCCCCCO}</chem>                   | M25 |
| 208 | Diglycolic acid       | 1,6-Hexanediol                            | 9.96  | 22.53 | 2.26 | 1:1 | <chem>{[O=C]C(=O)COC(=O)[O]OCCCCCO}</chem>                   | M25 |
| 209 | Diglycolic acid       | 3-methyl-1,5-<br>pentanediol              | 7.92  | 21.51 | 2.72 | 1:1 | <chem>{[O=C]C(=O)COC(=O)[O]OCCC(C)CCO}</chem>                | M25 |
| 210 | Diglycolic acid       | 1,7-heptanediol                           | 10.24 | 28.59 | 2.79 | 1:1 | <chem>{[O=C]C(=O)COC(=O)[O]OCCCCCCO}</chem>                  | M25 |
| 211 | Diglycolic acid       | 1,8-octanediol                            | 4.88  | 14.40 | 2.95 | 1:1 | <chem>{[O=C]C(=O)COC(=O)[O]OCCCCCCCO}</chem>                 | M25 |
| 212 | Diglycolic acid       | 1,9-nonanediol                            | 9.55  | 32.64 | 3.42 | 1:1 | <chem>{[O=C]C(=O)COC(=O)[O]OCCCCCCCCO}</chem>                | M25 |

Supplementary Dataset S4: Polymer Library Members

|     |                                          |                                 |       |       |      |     |                                                             |     |
|-----|------------------------------------------|---------------------------------|-------|-------|------|-----|-------------------------------------------------------------|-----|
| 213 | 2,2'-Thiodiacetic acid                   | 3-methyl-1,5-pentanediol        | 8.67  | 27.38 | 3.16 | 1:1 | <chem>{[C(=O)CSCC(=O)[C],&gt;]OCCC(C)CCO[&gt;]}</chem>      | M25 |
| 214 | 2,2'-Thiodiacetic acid                   | 1,10-decanediol                 | 5.36  | 16.70 | 3.12 | 1:1 | <chem>{[C(=O)CSCC(=O)[C],&gt;]OCCCCCCCCCO[&gt;]}</chem>     | M25 |
| 215 | [(Carboxymethyl)(methylamino)acetic acid | 1,4-Butanediol                  | 5.31  | 10.99 | 2.07 | 1:1 | <chem>{[C(=O)CN(C)CC(=O)[C],&gt;]OCCCCO[&gt;]}</chem>       | M25 |
| 216 | [(Carboxymethyl)(methylamino)acetic acid | 1,6-Hexanediol                  | 4.50  | 8.75  | 1.95 | 1:1 | <chem>{[C(=O)CN(C)CC(=O)[C],&gt;]OCCCCCCO[&gt;]}</chem>     | M25 |
| 217 | [(Carboxymethyl)(methylamino)acetic acid | 3-methyl-1,5-pentanediol        | 3.53  | 6.05  | 1.72 | 1:1 | <chem>{[C(=O)CN(C)CC(=O)[C],&gt;]OCCC(C)CCO[&gt;]}</chem>   | M25 |
| 218 | [(Carboxymethyl)(methylamino)acetic acid | 1,10-decanediol                 | 3.30  | 5.52  | 1.68 | 1:1 | <chem>{[C(=O)CN(C)CC(=O)[C],&gt;]OCCCCCCC[&gt;]}</chem>     | M25 |
| 219 | 2,2'-Thiodiacetic acid                   | ethylene glycol                 | 3.05  | 5.06  | 1.66 | 1:1 | <chem>{[C(=O)CSCC(=O)[C],&gt;]OCCO[&gt;]}</chem>            | M25 |
| 220 | 2,2'-Thiodiacetic acid                   | 1,4-Butanediol                  | 8.76  | 21.37 | 2.44 | 1:1 | <chem>{[C(=O)CSCC(=O)[C],&gt;]OCCCCO[&gt;]}</chem>          | M25 |
| 221 | 2,2'-Thiodiacetic acid                   | 1,6-Hexanediol                  | 11.35 | 31.59 | 2.78 | 1:1 | <chem>{[C(=O)CSCC(=O)[C],&gt;]OCCCCCCO[&gt;]}</chem>        | M25 |
| 222 | Adipic acid                              | 2,2-Diethyl-1,3-propanediol     | 7.79  | 14.79 | 1.90 | 1:1 | <chem>{[C(=O)CCCCC(=O)[C],&gt;]OCC(CC)(CC)CO[&gt;]}</chem>  | M25 |
| 223 | Adipic acid                              | 1,2-Propanediol                 |       |       |      | 1:1 | <chem>{[C(=O)CCCCC(=O)[C],&gt;]OCC(C)O[&gt;]}</chem>        | M25 |
| 224 | Adipic acid                              | 2-Methyl-1,3-propanediol        | 9.47  | 17.96 | 1.90 | 1:1 | <chem>{[C(=O)CCCCC(=O)[C],&gt;]OCC(C)CO[&gt;]}</chem>       | M25 |
| 225 | Adipic acid                              | 2-Butyl-2-ethyl-1,3-propanediol | 12.23 | 24.49 | 2.00 | 1:1 | <chem>{[C(=O)CCCCC(=O)[C],&gt;]OCC(CC)(CCC)CO[&gt;]}</chem> | M25 |

Supplementary Dataset S4: Polymer Library Members

|     |               |                                                               |      |       |      |     |                                                                  |     |
|-----|---------------|---------------------------------------------------------------|------|-------|------|-----|------------------------------------------------------------------|-----|
| 226 | Adipic acid   | 2,2,4-Trimethyl-1,3-pentanediol                               | 7.06 | 16.39 | 2.32 | 1:1 | <chem>{[O=C]C(=O)CCCC(=O)[C@H](O)C(C)C(C)C(O)C(=O)O}</chem>      | M25 |
| 227 | Adipic acid   | 2,2-Dimethyl-1,3-propanediol                                  | 6.02 | 11.83 | 1.96 | 1:1 | <chem>{[O=C]C(=O)CCCC(=O)[C@H](O)C(C)CO(C)C(=O)O}</chem>         | M25 |
| 228 | Adipic acid   | cis-2-Butene-1,4-diol                                         | 9.66 | 18.83 | 1.95 | 1:1 | <chem>{[O=C]C(=O)CCCC(=O)[C@H](O)C/C=C/C(O)C(=O)O}</chem>        | M25 |
| 229 | Adipic acid   | 4,4'-Isopropylidenedicyclohexanol, mixture of isomers         | 6.53 | 14.56 | 2.23 | 1:1 | <chem>{[O=C]C(=O)CCCC(=O)[C@H](O)C(C1)CCC1C(C)C(C2)CCC2O}</chem> | M25 |
| 230 | Adipic acid   | 4,8-Bis(hydroxymethyl)tricyclo[5.2.1.0 <sup>2,6</sup> ]decane | 6.91 | 13.18 | 1.91 | 1:1 | <chem>{[O=C]C(=O)CCCC(=O)[C@H](O)C(C1)C2C3C1C2CC3CO}</chem>      | M25 |
| 231 | Adipic acid   | 2-Butyne-1,4-diol                                             |      |       |      | 1:1 | <chem>{[O=C]C(=O)CCCC(=O)[C@H](O)C#CCO}</chem>                   | M25 |
| 232 | Adipic acid   | 2,3-Butanediol                                                |      |       |      | 1:1 | <chem>{[O=C]C(=O)CCCC(=O)[C@H](O)C(C)C(O)C(=O)O}</chem>          | M25 |
| 233 | Succinic acid | Resorcinol                                                    |      |       |      | 1:1 | <chem>{[O=C]C(=O)CCC(=O)[C@H](O)c1ccc(O)c1}</chem>               | M25 |
| 234 | Adipic acid   | 1,4-Cyclohexanediol                                           |      |       |      | 1:1 | <chem>{[O=C]C(=O)CCCC(=O)[C@H](O)C(C1)CCC1O}</chem>              | M25 |
| 235 | Adipic acid   | Resorcinol                                                    |      |       |      | 1:1 | <chem>{[O=C]C(=O)CCCC(=O)[C@H](O)c1ccc(O)c1}</chem>              | M25 |
| 236 | Succinic acid | 2,3-Butanediol                                                |      |       |      | 1:1 | <chem>{[O=C]C(=O)CCC(=O)[C@H](O)C(C)C(O)C(=O)O}</chem>           | M25 |
| 237 | Succinic acid | 1,4-Cyclohexanediol                                           |      |       |      | 1:1 | <chem>{[O=C]C(=O)CCC(=O)[C@H](O)C(C1)CCC1O}</chem>               | M25 |
| 238 | Succinic acid | cis-2-Butene-1,4-diol                                         |      |       |      | 1:1 | <chem>{[O=C]C(=O)CCC(=O)[C@H](O)C/C=C/C(O)C(=O)O}</chem>         | M25 |
| 239 | Succinic acid | 2,2-Diethyl-1,3-propanediol                                   |      |       |      | 1:1 | <chem>{[O=C]C(=O)CCC(=O)[C@H](O)C(C)C(C)CO}</chem>               | M25 |

Supplementary Dataset S4: Polymer Library Members

|     |                                           |                                                               |       |       |      |     |                                                                        |     |
|-----|-------------------------------------------|---------------------------------------------------------------|-------|-------|------|-----|------------------------------------------------------------------------|-----|
| 240 | Suberic acid                              | 1,4-Cyclohexanedimethanol                                     |       |       |      | 1:1 | <chem>{[C@H]1C(=O)CCCCCCC(=O)[C@@H]1OCC(C1)CC1CO}</chem>               | M25 |
| 241 | Succinic acid                             | 2-Methyl-1,3-propanediol                                      |       |       |      | 1:1 | <chem>{[C@H]1C(=O)CCC(=O)[C@@H]1OCC(C)CO}</chem>                       | M25 |
| 242 | Succinic acid                             | 2-Butyl-2-ethyl-1,3-propanediol                               | 20.47 | 32.80 | 1.60 | 1:1 | <chem>{[C@H]1C(=O)CCC(=O)[C@@H]1OCC(CC)(CCCC)CO}</chem>                | M25 |
| 243 | Succinic acid                             | 2,2,4-Trimethyl-1,3-pentanediol                               |       |       |      | 1:1 | <chem>{[C@H]1C(=O)CCC(=O)[C@@H]1OCC(C)(C)C(C)CO}</chem>                | M25 |
| 244 | Succinic acid                             | 2,2-Dimethyl-1,3-propanediol                                  |       |       |      | 1:1 | <chem>{[C@H]1C(=O)CCC(=O)[C@@H]1OCC(C)(C)CO}</chem>                    | M25 |
| 245 | Succinic acid                             | 1,4-Cyclohexanedimethanol                                     |       |       |      | 1:1 | <chem>{[C@H]1C(=O)CCC(=O)[C@@H]1OCC(C1)CCC1CO}</chem>                  | M25 |
| 246 | Succinic acid                             | 4,4'-Isopropylidenedicyclohexanol, mixture of isomers         |       |       |      | 1:1 | <chem>{[C@H]1C(=O)CCC(=O)[C@@H]1OC(C1)CCC1C(C)C(C2)CCC2O}</chem>       | M25 |
| 247 | Succinic acid                             | 4,8-Bis(hydroxymethyl)tricyclo[5.2.1.0 <sup>2,6</sup> ]decane |       |       |      | 1:1 | <chem>{[C@H]1C(=O)CCC(=O)[C@@H]1OCC(CC(C1)C2C3)C1C2CC3CO}</chem>       | M25 |
| 248 | Succinic acid                             | Bisphenol A                                                   |       |       |      | 1:1 | <chem>{[C@H]1C(=O)CCC(=O)[C@@H]1Oc1ccc(cc1)C(C)(C)c2ccc(cc2)O}</chem>  | M25 |
| 249 | [(Carboxymethyl)(methyl)amino]acetic acid | 1,4-Cyclohexanedimethanol                                     |       |       |      | 1:1 | <chem>{[C@H]1C(=O)CN(C)CC(=O)[C@@H]1OCC(C1)CC1CO}</chem>               | M25 |
| 250 | 2,2'-Thiodiacetic acid                    | 2,3-Butanediol                                                |       |       |      | 1:1 | <chem>{[C@H]1C(=O)CSCC(=O)[C@@H]1OC(C)C(C)O}</chem>                    | M25 |
| 251 | 2,2'-Thiodiacetic acid                    | Bisphenol A                                                   |       |       |      | 1:1 | <chem>{[C@H]1C(=O)CSCC(=O)[C@@H]1Oc1ccc(cc1)C(C)(C)c2ccc(cc2)O}</chem> | M25 |

Supplementary Dataset S4: Polymer Library Members

|     |                                          |                                                       |       |       |      |     |                                                                                   |     |
|-----|------------------------------------------|-------------------------------------------------------|-------|-------|------|-----|-----------------------------------------------------------------------------------|-----|
| 252 | [(Carboxymethyl)(methylamino)acetic acid | 4,4'-Isopropylidenedicyclohexanol, mixture of isomers |       |       |      | 1:1 | { <chem>[*][*]C(=O)CN(C)CC(=O)[*],[*]OC(CC1)CCC1C(C)(C)C(CC2)CCC2O[*][*]</chem> } | M25 |
| 253 | [(Carboxymethyl)(methylamino)acetic acid | 2-Butyl-2-ethyl-1,3-propanediol                       |       |       |      | 1:1 | { <chem>[*][*]C(=O)CN(C)CC(=O)[*],[*]OCC(CC)(CCC)CO[*][*]</chem> }                | M25 |
| 254 | [(Carboxymethyl)(methylamino)acetic acid | Resorcinol                                            |       |       |      | 1:1 | { <chem>[*][*]C(=O)CN(C)CC(=O)[*],[*]Oc1cccc(c1)O[*][*]</chem> }                  | M25 |
| 255 | [(Carboxymethyl)(methylamino)acetic acid | 2,3-Butanediol                                        |       |       |      | 1:1 | { <chem>[*][*]C(=O)CN(C)CC(=O)[*],[*]OC(C)C(C)O[*][*]</chem> }                    | M25 |
| 256 | 2,2'-Thiodiacetic acid                   | 1,4-Cyclohexanedimethanol                             | 26.76 | 40.97 | 2.22 | 1:1 | { <chem>[*][*]C(=O)CSCC(=O)[*],[*]OCC(CC1)CCC1CO[*][*]</chem> }                   | M25 |
| 257 | 2,2'-Thiodiacetic acid                   | 4,4'-Isopropylidenedicyclohexanol, mixture of isomers |       |       |      | 1:1 | { <chem>[*][*]C(=O)CSCC(=O)[*],[*]OC(CC1)CCC1C(C)(C)C(CC2)CCC2O[*][*]</chem> }    | M25 |
| 258 | 2,2'-Thiodiacetic acid                   | 2-Butyl-2-ethyl-1,3-propanediol                       | 26.76 | 50.57 | 1.89 | 1:1 | { <chem>[*][*]C(=O)CSCC(=O)[*],[*]OCC(CC)(CCCC)CO[*][*]</chem> }                  | M25 |
| 259 | 2,2'-Thiodiacetic acid                   | Resorcinol                                            |       |       |      | 1:1 | { <chem>[*][*]C(=O)CSCC(=O)[*],[*]Oc1cccc(c1)O[*][*]</chem> }                     | M25 |
| 260 | Diglycolic acid                          | 2,2-Diethyl-1,3-propanediol                           | 12.91 | 19.18 | 1.49 | 1:1 | { <chem>[*][*]C(=O)COC(=O)[*],[*]OCC(CC)(CC)CO[*][*]</chem> }                     | M25 |
| 261 | Diglycolic acid                          | Bisphenol A                                           | 10.80 | 18.57 | 1.72 | 1:1 | { <chem>[*][*]C(=O)COC(=O)[*],[*]Oc1ccc(cc1)C(C)(C)c2ccc(cc2)O[*][*]</chem> }     | M25 |
| 262 | Diglycolic acid                          | Resorcinol                                            |       |       |      | 1:1 | { <chem>[*][*]C(=O)COC(=O)[*],[*]Oc1cccc(c1)O[*][*]</chem> }                      | M25 |
| 263 | Diglycolic acid                          | 2-Methyl-1,3-propanediol                              | 20.45 | 29.38 | 1.44 | 1:1 | { <chem>[*][*]C(=O)COC(=O)[*],[*]OCC(C)CO[*][*]</chem> }                          | M25 |

Supplementary Dataset S4: Polymer Library Members

|     |                        |                                                               |       |       |      |     |                                                               |     |
|-----|------------------------|---------------------------------------------------------------|-------|-------|------|-----|---------------------------------------------------------------|-----|
| 264 | Diglycolic acid        | 2-Butyl-2-ethyl-1,3-propanediol                               | 14.84 | 23.83 | 1.61 | 1:1 | <chem>{[O]C(=O)COC(=O)[C@H](O)C(C)CCCCO}</chem>               | M25 |
| 265 | Diglycolic acid        | 2,2,4-Trimethyl-1,3-pentanediol                               |       |       |      | 1:1 | <chem>{[O]C(=O)COC(=O)[C@H](O)C(C)C(C)C(C)CO}</chem>          | M25 |
| 266 | Diglycolic acid        | 2,2-Dimethyl-1,3-propanediol                                  | 16.45 | 26.42 | 1.61 | 1:1 | <chem>{[O]C(=O)COC(=O)[C@H](O)C(C)CO}</chem>                  | M25 |
| 267 | Diglycolic acid        | 1,4-Cyclohexanedimethanol                                     |       |       |      | 1:1 | <chem>{[O]C(=O)COC(=O)[C@H](O)C(C1)CCC1CO}</chem>             | M25 |
| 268 | Diglycolic acid        | 4,4'-Isopropylidenedicyclohexanol, mixture of isomers         | 8.29  | 14.89 | 1.80 | 1:1 | <chem>{[O]C(=O)COC(=O)[C@H](O)C(C1)CCC1C(C)C(C2)CCC2O}</chem> | M25 |
| 269 | Diglycolic acid        | 4,8-Bis(hydroxymethyl)tricyclo[5.2.1.0 <sup>2,6</sup> ]decane |       |       |      | 1:1 | <chem>{[O]C(=O)COC(=O)[C@H](O)C(C1)C2C3C1C2CC3CO}</chem>      | M25 |
| 270 | Diglycolic acid        | Dianhydro-D-glucitol                                          |       |       |      | 1:1 | <chem>{[O]C(=O)COC(=O)[C@H](O)C(C1CO1)C(C2CO2)O}</chem>       | M25 |
| 271 | Terephthaloyl Chloride | ethylene glycol                                               |       |       |      | 1:1 | <chem>{[O]C(=O)c1ccc(cc1)C(=O)[C@H](O)CCO}</chem>             | M31 |
| 272 | Terephthaloyl Chloride | 1,4-Butanediol                                                |       |       |      | 1:1 | <chem>{[O]C(=O)c1ccc(cc1)C(=O)[C@H](O)CCCCO}</chem>           | M31 |
| 273 | Terephthaloyl Chloride | cis-2-Butene-1,4-diol                                         |       |       |      | 1:1 | <chem>{[O]C(=O)c1ccc(cc1)C(=O)[C@H](O)C/C=C/CO}</chem>        | M31 |
| 274 | Terephthaloyl Chloride | 2-Methyl-1,3-propanediol                                      |       |       |      | 1:1 | <chem>{[O]C(=O)c1ccc(cc1)C(=O)[C@H](O)C(C)CO}</chem>          | M31 |
| 275 | Terephthaloyl Chloride | 2-Butyl-2-ethyl-1,3-propanediol                               |       |       |      | 1:1 | <chem>{[O]C(=O)c1ccc(cc1)C(=O)[C@H](O)C(C)CCCCO}</chem>       | M31 |

Supplementary Dataset S4: Polymer Library Members

|     |                                  |                                                       |     |                                                                               |     |
|-----|----------------------------------|-------------------------------------------------------|-----|-------------------------------------------------------------------------------|-----|
| 276 | Terephthaloyl Chloride           | 1,4-Cyclohexanedim ethanol                            | 1:1 | <chem>{[*]C(=O)c1ccc(cc1)C(=O)[*],[*]OCC(CC1)CCC1CO[*]}</chem>                | M31 |
| 277 | Terephthaloyl Chloride           | 4,4'-Isopropylidenedicyclohexanol, mixture of isomers | 1:1 | <chem>{[*]C(=O)c1ccc(cc1)C(=O)[*],[*]OC(CC1)CC1C(C)(C)C(CC2)CCC2O[*]}</chem>  | M31 |
| 278 | Terephthaloyl Chloride           | Bisphenol A                                           | 1:1 | <chem>{[*]C(=O)c1ccc(cc1)C(=O)[*],[*]Oc1ccc(cc1)C(C)(C)c2ccc(cc2)O[*]}</chem> | M31 |
| 279 | 1,4-Cyclohexanedicarboxylic acid | ethylene glycol                                       | 1:1 | <chem>{[*]C(=O)C(CC1)CCC1C(=O)[*],[*]OCCO[*]}</chem>                          | M25 |
| 280 | 1,4-Cyclohexanedicarboxylic acid | 2,2-Dimethyl-1,3-propanediol                          | 1:1 | <chem>{[*]C(=O)C(CC1)CCC1C(=O)[*],[*]OCC(C)(C)CO[*]}</chem>                   | M25 |
| 281 | 1,4-Cyclohexanedicarboxylic acid | 2-Methyl-1,3-propanediol                              | 1:1 | <chem>{[*]C(=O)C(CC1)CCC1C(=O)[*],[*]OCC(C)CO[*]}</chem>                      | M25 |
| 282 | 1,4-Cyclohexanedicarboxylic acid | 1,4-Butanediol                                        | 1:1 | <chem>{[*]C(=O)C(CC1)CCC1C(=O)[*],[*]OCCCCO[*]}</chem>                        | M25 |
| 283 | 1,4-Cyclohexanedicarboxylic acid | 3-methyl-1,5-pentanediol                              | 1:1 | <chem>{[*]C(=O)C(CC1)CCC1C(=O)[*],[*]OCCC(C)CCO[*]}</chem>                    | M25 |
| 284 | 1,4-Cyclohexanedicarboxylic acid | 1,10-decanediol                                       | 1:1 | <chem>{[*]C(=O)C(CC1)CCC1C(=O)[*],[*]OCCCCCCCCCO[*]}</chem>                   | M25 |
| 285 | 1,4-Cyclohexanedicarboxylic acid | 2-Butyl-2-ethyl-1,3-propanediol                       | 1:1 | <chem>{[*]C(=O)C(CC1)CCC1C(=O)[*],[*]OCC(C)(C)(CCCC)CO[*]}</chem>             | M25 |
| 286 | 1,4-Cyclohexanedicarboxylic acid | 1,4-Cyclohexanediol                                   | 1:1 | <chem>{[*]C(=O)C(CC1)CCC1C(=O)[*],[*]OC(CC1)CCC1O[*]}</chem>                  | M25 |



Supplementary Dataset S4: Polymer Library Members

|     |                                  |                                                               |       |       |      |     |                                                                        |     |
|-----|----------------------------------|---------------------------------------------------------------|-------|-------|------|-----|------------------------------------------------------------------------|-----|
| 287 | 1,4-Cyclohexanedicarboxylic acid | 1,4-Cyclohexanedimethanol                                     |       |       |      | 1:1 | <chem>{[O=C]C(=O)C(CC1)CCC1C(=O)[OCC(C1)CCC1CO]}</chem>                | M25 |
| 288 | 1,4-Cyclohexanedicarboxylic acid | 4,4'-Isopropylidenedicyclohexanol, mixture of isomers         |       |       |      | 1:1 | <chem>{[O=C]C(=O)C(CC1)CCC1C(=O)OC(CC1)CCC1C(C)(C)C(CC2)CCC2O]}</chem> | M25 |
| 289 | 1,4-Cyclohexanedicarboxylic acid | 4,8-Bis(hydroxymethyl)tricyclo[5.2.1.0 <sup>2,6</sup> ]decane |       |       |      | 1:1 | <chem>{[O=C]C(=O)C(CC1)CCC1C(=O)OCC(C(C1)C2C3)C1C2CC3CO]}</chem>       | M25 |
| 290 | azelaic acid                     | ethylene glycol                                               | 8.89  | 19.11 | 2.15 | 1:1 | <chem>{[O=C]C(=O)CCCCCCCC(=O)OCCO}</chem>                              | M25 |
| 291 | pimelic acid                     | 3-methyl-1,5-pentanediol                                      | 16.32 | 62.65 | 3.84 | 1:1 | <chem>{[O=C]C(=O)CCCCC(=O)OCCC(C)CO}</chem>                            | M25 |
| 292 | azelaic acid                     | 1,3-Propanediol                                               | 9.44  | 26.33 | 2.79 | 1:1 | <chem>{[O=C]C(=O)CCCCCCCC(=O)OCCCO}</chem>                             | M25 |
| 293 | azelaic acid                     | 1,4-Butanediol                                                |       |       |      | 1:1 | <chem>{[O=C]C(=O)CCCCCCCC(=O)OCCCCO}</chem>                            | M25 |
| 294 | azelaic acid                     | 1,5-pentanediol                                               |       |       |      | 1:1 | <chem>{[O=C]C(=O)CCCCCCCC(=O)OCCCCO}</chem>                            | M25 |
| 295 | azelaic acid                     | 3-methyl-1,5-pentanediol                                      | 8.02  | 42.88 | 5.35 | 1:1 | <chem>{[O=C]C(=O)CCCCCCCC(=O)OCCC(C)CO}</chem>                         | M25 |
| 296 | azelaic acid                     | 1,10-decanediol                                               | 15.75 | 137.4 | 8.72 | 1:1 | <chem>{[O=C]C(=O)CCCCCCCC(=O)OCCCCCCCCCO}</chem>                       | M25 |
| 297 | pimelic acid                     | ethylene glycol                                               | 11.41 | 59.09 | 5.18 | 1:1 | <chem>{[O=C]C(=O)CCCCC(=O)OCCO}</chem>                                 | M25 |
| 298 | pimelic acid                     | 1,3-Propanediol                                               | 8.13  | 12.47 | 1.53 | 1:1 | <chem>{[O=C]C(=O)CCCCC(=O)OCCCO}</chem>                                | M25 |
| 299 | pimelic acid                     | 1,4-Butanediol                                                | 11.70 | 37.81 | 3.23 | 1:1 | <chem>{[O=C]C(=O)CCCCC(=O)OCCCCO}</chem>                               | M25 |

Supplementary Dataset S4: Polymer Library Members

|     |               |                          |       |       |      |     |                                            |     |
|-----|---------------|--------------------------|-------|-------|------|-----|--------------------------------------------|-----|
| 300 | Succinic acid | ethylene glycol          |       |       |      | 1:1 | {[<]C(=O)CCC(=O)[<],[>]OCCO[>]}            | M25 |
| 302 | Succinic acid | 1,10-decanediol          | 17.90 | 49.25 | 2.75 | 1:1 | {[<]C(=O)CCC(=O)[<],[>]OCCCCCCCCCO[>]}     | M25 |
| 303 | Succinic acid | 1,3-Propanediol          | 5.35  | 8.50  | 1.59 | 1:1 | {[<]C(=O)CCC(=O)[<],[>]OCCCO[>]}           | M25 |
| 304 | Succinic acid | 1,4-Butanediol           |       |       |      | 1:1 | {[<]C(=O)CCC(=O)[<],[>]OCCCCO[>]}          | M25 |
| 305 | Succinic acid | 1,5-pentanediol          | 12.13 | 52.16 | 4.30 | 1:1 | {[<]C(=O)CCC(=O)[<],[>]OCCCCCO[>]}         | M25 |
| 306 | Succinic acid | 1,6-Hexanediol           | 13.67 | 38.96 | 2.85 | 1:1 | {[<]C(=O)CCC(=O)[<],[>]OCCCCCO[>]}         | M25 |
| 307 | Succinic acid | 2,5-hexanediol(+isomers) |       |       |      | 1:1 | {[<]C(=O)CCC(=O)[<],[>]OC(C)CCC(C)O[>]}    | M25 |
| 308 | Succinic acid | 3-methyl-1,5-pentanediol | 7.35  | 27.46 | 3.74 | 1:1 | {[<]C(=O)CCC(=O)[<],[>]OCCC(C)CCO[>]}      | M25 |
| 309 | Succinic acid | 1,7-heptanediol          | 14.85 | 45.93 | 3.09 | 1:1 | {[<]C(=O)CCC(=O)[<],[>]OCCCCCCO[>]}        | M25 |
| 310 | Succinic acid | 1,8-octanediol           | 14.14 | 40.09 | 2.84 | 1:1 | {[<]C(=O)CCC(=O)[<],[>]OCCCCCCCO[>]}       | M25 |
| 311 | glutaric acid | ethylene glycol          | 5.60  | 9.44  | 1.68 | 1:1 | {[<]C(=O)CCCC(=O)[<],[>]OCCO[>]}           | M25 |
| 312 | glutaric acid | 1,10-decanediol          | 13.96 | 37.78 | 2.71 | 1:1 | {[<]C(=O)CCCC(=O)[<],[>]OCCCCCCCCCO[>]}    | M25 |
| 313 | azelaic acid  | 1,8-octanediol           | 14.67 | 60.83 | 4.15 | 1:1 | {[<]C(=O)CCCCCCCC(=O)[<],[>]OCCCCCCCCO[>]} | M25 |
| 314 | glutaric acid | 1,3-Propanediol          | 6.41  | 11.98 | 1.87 | 1:1 | {[<]C(=O)CCCC(=O)[<],[>]OCCCO[>]}          | M25 |
| 315 | glutaric acid | 1,4-Butanediol           | 4.58  | 13.20 | 2.88 | 1:1 | {[<]C(=O)CCCC(=O)[<],[>]OCCCCO[>]}         | M25 |
| 316 | glutaric acid | 1,5-pentanediol          | 6.57  | 20.15 | 3.07 | 1:1 | {[<]C(=O)CCCC(=O)[<],[>]OCCCCCO[>]}        | M25 |

Supplementary Dataset S4: Polymer Library Members

|     |               |                          |       |       |      |     |                                                   |     |
|-----|---------------|--------------------------|-------|-------|------|-----|---------------------------------------------------|-----|
| 317 | glutaric acid | 1,6-Hexanediol           | 12.71 | 33.62 | 2.65 | 1:1 | $\{\text{[<]C(=O)CCCC(=O)[<],[>]OCCCCCO[>]}\}$    | M25 |
| 318 | glutaric acid | 3-methyl-1,5-pentanediol | 5.64  | 15.50 | 2.75 | 1:1 | $\{\text{[<]C(=O)CCCC(=O)[<],[>]OCCC(C)CCO[>]}\}$ | M25 |
| 319 | glutaric acid | 1,7-heptanediol          | 9.66  | 32.56 | 3.37 | 1:1 | $\{\text{[<]C(=O)CCCC(=O)[<],[>]OCCCCCO[>]}\}$    | M25 |
| 320 | glutaric acid | 1,8-octanediol           | 9.80  | 49.39 | 5.04 | 1:1 | $\{\text{[<]C(=O)CCCC(=O)[<],[>]OCCCCCO[>]}\}$    | M25 |
| 321 | glutaric acid | 1,9-nonanediol           | 14.95 | 58.88 | 3.94 | 1:1 | $\{\text{[<]C(=O)CCCC(=O)[<],[>]OCCCCCO[>]}\}$    | M25 |
| 322 | Adipic acid   | ethylene glycol          |       |       |      | 1:1 | $\{\text{[<]C(=O)CCCC(=O)[<],[>]OCCO[>]}\}$       | M25 |
| 323 | Adipic acid   | 1,10-decanediol          |       |       |      | 1:1 | $\{\text{[<]C(=O)CCCC(=O)[<],[>]OCCCCCO[>]}\}$    | M25 |
| 324 | azelaic acid  | 1,9-nonanediol           | 25.36 | 102.9 | 4.06 | 1:1 | $\{\text{[<]C(=O)CCCC(=O)[<],[>]OCCCCCO[>]}\}$    | M25 |
| 325 | Adipic acid   | 1,3-Propanediol          |       |       |      | 1:1 | $\{\text{[<]C(=O)CCCC(=O)[<],[>]OCCO[>]}\}$       | M25 |
| 326 | Adipic acid   | 1,4-Butanediol           | 3.60  | 7.86  | 2.19 | 1:1 | $\{\text{[<]C(=O)CCCC(=O)[<],[>]OCCCO[>]}\}$      | M25 |
| 327 | Adipic acid   | 1,5-pentanediol          |       |       |      | 1:1 | $\{\text{[<]C(=O)CCCC(=O)[<],[>]OCCCCO[>]}\}$     | M25 |
| 328 | Adipic acid   | 1,6-Hexanediol           | 8.25  | 44.50 | 5.39 | 1:1 | $\{\text{[<]C(=O)CCCC(=O)[<],[>]OCCCCCO[>]}\}$    | M25 |
| 329 | Adipic acid   | 3-methyl-1,5-pentanediol |       |       |      | 1:1 | $\{\text{[<]C(=O)CCCC(=O)[<],[>]OCCC(C)CCO[>]}\}$ | M25 |
| 330 | Adipic acid   | 1,7-heptanediol          |       |       |      | 1:1 | $\{\text{[<]C(=O)CCCC(=O)[<],[>]OCCCCCO[>]}\}$    | M25 |

Supplementary Dataset S4: Polymer Library Members

|     |                  |                          |      |       |      |     |                                                              |     |
|-----|------------------|--------------------------|------|-------|------|-----|--------------------------------------------------------------|-----|
| 331 | Adipic acid      | 1,8-octanediol           |      |       |      | 1:1 | $\{\{[<]C(=O)CCCC(=O)[<],[>]OCCCCCCC$<br>$O[>]\}\}$          | M25 |
| 332 | Adipic acid      | 1,9-nonanediol           |      |       |      | 1:1 | $\{\{[<]C(=O)CCCC(=O)[<],[>]OCCCCCCC$<br>$CO[>]\}\}$         | M25 |
| 333 | isophthalic acid | ethylene glycol          |      |       |      | 1:1 | $\{\{[<]C(=O)c(ccc1)cc1C(=O)[<],[>]OCCO[>]\}\}$              | M25 |
| 334 | isophthalic acid | 1,10-decanediol          | 4.09 | 9.09  | 2.22 | 1:1 | $\{\{[<]C(=O)c(ccc1)cc1C(=O)[<],[>]OCCCCC$<br>$CCCCO[>]\}\}$ | M25 |
| 335 | isophthalic acid | 1,2-Propanediol          | 6.00 | 12.80 | 2.13 | 1:1 | $\{\{[<]C(=O)c(ccc1)cc1C(=O)[<],[>]OCC(C)O[$<br>$>]\}\}$     | M25 |
| 336 | isophthalic acid | 1,3-Propanediol          |      |       |      | 1:1 | $\{\{[<]C(=O)c(ccc1)cc1C(=O)[<],[>]OCCCO[>][$<br>$]\}\}$     | M25 |
| 337 | isophthalic acid | 1,4-Butanediol           |      |       |      | 1:1 | $\{\{[<]C(=O)c(ccc1)cc1C(=O)[<],[>]OCCCCO[$<br>$>]\}\}$      | M25 |
| 338 | isophthalic acid | 1,5-pentanediol          |      |       |      | 1:1 | $\{\{[<]C(=O)c(ccc1)cc1C(=O)[<],[>]OCCCCO$<br>$[>]\}\}$      | M25 |
| 339 | isophthalic acid | 1,6-Hexanediol           |      |       |      | 1:1 | $\{\{[<]C(=O)c(ccc1)cc1C(=O)[<],[>]OCCCCC$<br>$O[>]\}\}$     | M25 |
| 340 | isophthalic acid | 3-methyl-1,5-pentanediol |      |       |      | 1:1 | $\{\{[<]C(=O)c(ccc1)cc1C(=O)[<],[>]OCCC(C)C$<br>$CO[>]\}\}$  | M25 |
| 341 | isophthalic acid | 1,7-heptanediol          |      |       |      | 1:1 | $\{\{[<]C(=O)c(ccc1)cc1C(=O)[<],[>]OCCCCC$<br>$CO[>]\}\}$    | M25 |
| 342 | isophthalic acid | 1,8-octanediol           |      |       |      | 1:1 | $\{\{[<]C(=O)c(ccc1)cc1C(=O)[<],[>]OCCCCC$<br>$CCO[>]\}\}$   | M25 |
| 343 | isophthalic acid | 1,9-nonanediol           |      |       |      | 1:1 | $\{\{[<]C(=O)c(ccc1)cc1C(=O)[<],[>]OCCCCC$<br>$CCCO[>]\}\}$  | M25 |

Supplementary Dataset S4: Polymer Library Members

|     |                                          |                                 |      |       |      |     |                                                        |     |
|-----|------------------------------------------|---------------------------------|------|-------|------|-----|--------------------------------------------------------|-----|
| 344 | Terephthaloyl Chloride                   | 1,2-propanediol                 | 7.56 | 19.29 | 2.55 | 1:1 | <chem>{[O=C]c1ccc(cc1)C(=O)[OCC(C)O]}</chem>           | M31 |
| 345 | 1,4-Cyclohexanedi carboxylic acid        | 2,2,4-Trimethyl-1,3-pentanediol |      |       |      | 1:1 | <chem>{[O=C]C(CC1)CCC1C(=O)[OCC(C)(C)C(C)O]}</chem>    | M1  |
| 346 | isophthalic acid                         | 1,2-propanediol                 |      |       |      | 1:1 | <chem>{[O=C]c(ccc1)cc1C(=O)[OCC(C)O]}</chem>           | M18 |
| 347 | [(Carboxymethyl)(methylamino)acetic acid | 2,2,4-Trimethyl-1,3-pentanediol |      |       |      | 1:1 | <chem>{[O=C]CN(C)CC(=O)[OCC(C)(C)C(C)O]}</chem>        | M11 |
| 348 | 2,6-Naphthalenedi carboxylic Acid        | 2,2,4-Trimethyl-1,3-pentanediol |      |       |      | 1:1 | <chem>{[O=C]c(ccc1c2)cc1ccc2C(=O)C(C)(C)C(C)O]}</chem> | M11 |
| 349 | 2,6-Naphthalenedi carboxylic Acid        | 1,4-Butanediol                  |      |       |      | 1:1 | <chem>{[O=C]c(ccc1c2)cc1ccc2C(=O)OCCCO]}</chem>        | M12 |
| 350 | 2,2'-Thiodiacetic acid                   | 1,5-pentanediol                 |      |       |      | 1:1 | <chem>{[O=C]CSCC(=O)[OCCCCCO]}</chem>                  | M12 |
| 351 | 1,4-Cyclohexanedi carboxylic acid        | 1,5-pentanediol                 |      |       |      | 1:1 | <chem>{[O=C]C(CC1)CCC1C(=O)OCCCCCO]}</chem>            | M12 |
| 352 | [(Carboxymethyl)(methylamino)acetic acid | 1,5-pentanediol                 |      |       |      | 1:1 | <chem>{[O=C]CN(C)CC(=O)OCCCCCO]}</chem>                | M12 |
| 353 | 2,6-Naphthalenedi carboxylic Acid        | 1,5-pentanediol                 |      |       |      | 1:1 | <chem>{[O=C]c(ccc1c2)cc1ccc2C(=O)OCCCCCO]}</chem>      | M12 |
| 354 | 1,4-Cyclohexanedi carboxylic acid        | 1,6-Hexanediol                  |      |       |      | 1:1 | <chem>{[O=C]C(CC1)CCC1C(=O)OCCCCCO]}</chem>            | M12 |
| 355 | 2,6-Naphthalenedi carboxylic Acid        | 1,6-Hexanediol                  |      |       |      | 1:1 | <chem>{[O=C]c(ccc1c2)cc1ccc2C(=O)OCCCCCO]}</chem>      | M12 |

Supplementary Dataset S4: Polymer Library Members

|     |                                          |                           |      |      |      |     |                                                                    |     |
|-----|------------------------------------------|---------------------------|------|------|------|-----|--------------------------------------------------------------------|-----|
| 356 | isophthalic acid                         | 2,3-Butanediol            |      |      |      | 1:1 | <chem>{[O=C]C(=O)c(ccc1)cc1C(=O)[C@H](O)C(C)C(O)}</chem>           | M18 |
| 357 | 1,4-Cyclohexanedicarboxylic acid         | 1,7-heptanediol           |      |      |      | 1:1 | <chem>{[O=C]C(=O)C(CC1)CCC1C(=O)[C@H](O)CCCCC(O)}</chem>           | M12 |
| 358 | 2,6-Naphthalenedicarboxylic Acid         | 1,7-heptanediol           |      |      |      | 1:1 | <chem>{[O=C]C(=O)c(ccc1c2)cc1ccc2C(=O)[C@H](O)CCCCC(O)}</chem>     | M12 |
| 359 | 1,4-Cyclohexanedicarboxylic acid         | 1,8-octanediol            |      |      |      | 1:1 | <chem>{[O=C]C(=O)C(CC1)CCC1C(=O)[C@H](O)CCCCC(O)}</chem>           | M12 |
| 360 | [(Carboxymethyl)(methylamino)acetic acid | 1,8-octanediol            |      |      |      | 1:1 | <chem>{[O=C]C(=O)CN(C)CC(=O)[C@H](O)CCCCCCC(O)}</chem>             | M12 |
| 361 | 2,6-Naphthalenedicarboxylic Acid         | 1,8-octanediol            |      |      |      | 1:1 | <chem>{[O=C]C(=O)c(ccc1c2)cc1ccc2C(=O)[C@H](O)CCCCC(O)}</chem>     | M12 |
| 362 | glutaric acid                            | 1,4-Cyclohexanedimethanol | 6.73 | 9.01 | 1.34 | 1:1 | <chem>{[O=C]C(=O)CCCC(=O)[C@H](O)CC(C1)CCC1CO}</chem>              | M12 |
| 363 | 2,6-Naphthalenedicarboxylic Acid         | 1,4-Cyclohexanedimethanol |      |      |      | 1:1 | <chem>{[O=C]C(=O)c(ccc1c2)cc1ccc2C(=O)[C@H](O)C(CC1)CCC1CO}</chem> | M12 |
| 364 | 2,2'-Thiodiacetic acid                   | 1,9-nonanediol            |      |      |      | 1:1 | <chem>{[O=C]C(=O)CSCC(=O)[C@H](O)CCCCCCCC(O)}</chem>               | M12 |
| 365 | 1,4-Cyclohexanedicarboxylic acid         | 1,9-nonanediol            |      |      |      | 1:1 | <chem>{[O=C]C(=O)C(CC1)CCC1C(=O)[C@H](O)CCCCC(O)}</chem>           | M12 |
| 366 | isophthalic acid                         | 1,4-cyclohexanediol       |      |      |      | 1:1 | <chem>{[O=C]C(=O)c(ccc1)cc1C(=O)[C@H](O)C(CC1)CC1O}</chem>         | M18 |

Supplementary Dataset S4: Polymer Library Members

|     |                                  |                                                       |      |       |      |     |                                                                                |     |
|-----|----------------------------------|-------------------------------------------------------|------|-------|------|-----|--------------------------------------------------------------------------------|-----|
| 367 | 2,6-Naphthalenedicarboxylic Acid | 1,9-nonanediol                                        |      |       |      | 1:1 | <chem>{[C(=O)c(ccc1c2)cc1ccc2C(=O)[C],&gt;]OC CCCCCCCCO[&gt;]}</chem>          | M12 |
| 368 | pimelic acid                     | 1,10-decanediol                                       | 6.07 | 10.76 | 1.77 | 1:1 | <chem>{[C(=O)CCCCC(=O)[C],&gt;]OCCCCCCC CCO[&gt;]}</chem>                      | M12 |
| 369 | Sebacic Acid                     | 2-Methyl-1,3-propanediol                              | 2.51 | 4.27  | 1.70 | 1:1 | <chem>{[C(=O)CCCCCCCC(=O)[C],&gt;]OCC(C) CO[&gt;]}</chem>                      | M8  |
| 370 | Sebacic Acid                     | 4,4'-Isopropylidenedicyclohexanol, mixture of isomers |      |       |      | 1:1 | <chem>{[C(=O)CCCCCCCC(=O)[C],&gt;]OC(CC1) CCC1C(C)(C)C(CC2)CCC2O[&gt;]}</chem> | M8  |
| 371 | Sebacic Acid                     | 2,2,4-Trimethyl-1,3-pentanediol                       | 2.59 | 4.10  | 1.58 | 1:1 | <chem>{[C(=O)CCCCCCCC(=O)[C],&gt;]OCC(C)( C)C(C(C)C)O[&gt;]}</chem>            | M8  |
| 372 | Sebacic Acid                     | 1,4-Butanediol                                        |      |       |      | 1:1 | <chem>{[C(=O)CCCCCCCC(=O)[C],&gt;]OCCCC O[&gt;]}</chem>                        | M20 |
| 373 | Sebacic Acid                     | 1,5-pentanediol                                       | 4.04 | 7.60  | 1.88 | 1:1 | <chem>{[C(=O)CCCCCCCC(=O)[C],&gt;]OCCCC CO[&gt;]}</chem>                       | M8  |
| 374 | pimelic acid                     | 4,4'-Isopropylidenedicyclohexanol, mixture of isomers |      |       |      | 1:1 | <chem>{[C(=O)CCCCC(=O)[C],&gt;]OC(CC1)CCC 1C(C)(C)C(CC2)CCC2O[&gt;]}</chem>    | M13 |
| 375 | glutaric acid                    | 2-Methyl-1,3-propanediol                              |      |       |      | 1:1 | <chem>{[C(=O)CCCC(=O)[C],&gt;]OCC(C)CO[&gt;]}</chem>                           | M3  |
| 376 | azelaic acid                     | 4,4'-Isopropylidenedicyclohexanol, mixture of isomers | 6.98 | 8.54  | 1.22 | 1:1 | <chem>{[C(=O)CCCCCCCC(=O)[C],&gt;]OC(CC1)C CC1C(C)(C)C(CC2)CCC2O[&gt;]}</chem> | M13 |

Supplementary Dataset S4: Polymer Library Members

|     |              |                                 |      |      |      |     |                                                    |     |
|-----|--------------|---------------------------------|------|------|------|-----|----------------------------------------------------|-----|
| 377 | pimelic acid | 2,2,4-Trimethyl-1,3-pentanediol | 6.81 | 8.13 | 1.20 | 1:1 | {[<]C(=O)CCCCC(=O)[<],[>]OCC(C)(C)C(C(C)C)O[>]}    | M13 |
| 378 | azelaic acid | 2,2,4-Trimethyl-1,3-pentanediol | 6.78 | 8.14 | 1.20 | 1:1 | {[<]C(=O)CCCCCCCC(=O)[<],[>]OCC(C)(C)C(C(C)C)O[>]} | M13 |
| 379 | pimelic acid | 1,6-Hexanediol                  |      |      |      | 1:1 | {[<]C(=O)CCCCC(=O)[<],[>]OCCCCCO[>]}               | M13 |
| 380 | azelaic acid | 1,6-Hexanediol                  |      |      |      | 1:1 | {[<]C(=O)CCCCCCCC(=O)[<],[>]OCCCCCO[>]}            | M13 |
| 381 | Sebacic Acid | 1,6-Hexanediol                  |      |      |      | 1:1 | {[<]C(=O)CCCCCCCCC(=O)[<],[>]OCCCCCO[>]}           | M13 |
| 382 | Sebacic Acid | 1,7-heptanediol                 |      |      |      | 1:1 | {[<]C(=O)CCCCCCCCC(=O)[<],[>]OCCCCCO[>]}           | M13 |
| 383 | pimelic acid | 1,8-octanediol                  |      |      |      | 1:1 | {[<]C(=O)CCCCC(=O)[<],[>]OCCCCCO[>]}               | M13 |
| 384 | pimelic acid | 2-Methyl-1,3-propanediol        |      |      |      | 1:1 | {[<]C(=O)CCCCC(=O)[<],[>]OCC(C)CO[>]}              | M3  |
| 385 | Sebacic Acid | 1,8-octanediol                  |      |      |      | 1:1 | {[<]C(=O)CCCCCCCCC(=O)[<],[>]OCCCCCO[>]}           | M13 |
| 386 | pimelic acid | 1,4-Cyclohexanedim ethanol      |      |      |      | 1:1 | {[<]C(=O)CCCCC(=O)[<],[>]OCC(CC1)CC1CO[>]}         | M13 |
| 387 | azelaic acid | 1,4-Cyclohexanedim ethanol      |      |      |      | 1:1 | {[<]C(=O)CCCCCCCC(=O)[<],[>]OCC(CC1)CCC1CO[>]}     | M13 |
| 388 | Sebacic Acid | 1,4-Cyclohexanedim ethanol      |      |      |      | 1:1 | {[<]C(=O)CCCCCCCCC(=O)[<],[>]OCC(CC1)CCC1CO[>]}    | M13 |



Supplementary Dataset S4: Polymer Library Members

|     |                                   |                          |      |      |      |     |                                                  |     |
|-----|-----------------------------------|--------------------------|------|------|------|-----|--------------------------------------------------|-----|
| 389 | pimelic acid                      | 1,9-nonanediol           |      |      |      | 1:1 | <chem>{O=C(O)CCCCC(=O)OCCO}</chem>               | M13 |
| 390 | Sebacic Acid                      | 1,9-nonanediol           |      |      |      | 1:1 | <chem>{O=C(O)CCCCCCCC(=O)OCCO}</chem>            | M13 |
| 391 | Sebacic Acid                      | 1,10-decanediol          |      |      |      | 1:1 | <chem>{O=C(O)CCCCCCCCC(=O)OCCO}</chem>           | M13 |
| 392 | pimelic acid                      | diethylene glycol        | 1.97 | 2.81 | 1.42 | 1:1 | <chem>{O=C(O)CCCCC(=O)OCCOCCO}</chem>            | M14 |
| 393 | azelaic acid                      | diethylene glycol        | 1.84 | 2.91 | 1.58 | 1:1 | <chem>{O=C(O)CCCCCCC(=O)OCCOCCO}</chem>          | M14 |
| 394 | Sebacic Acid                      | diethylene glycol        |      |      |      | 1:1 | <chem>{O=C(O)CCCCCCCC(=O)OCCOCCO}</chem>         | M14 |
| 395 | 2,2'-Thiodiacetic acid            | 2-Methyl-1,3-propanediol |      |      |      | 1:1 | <chem>{O=C(O)CSCC(=O)OCC(C)CO}</chem>            | M3  |
| 396 | 1,4-Cyclohexanedi carboxylic acid | diethylene glycol        | 1.38 | 2.54 | 1.85 | 1:1 | <chem>{O=C(O)C1(CCC1)C(=O)OCCOCCO}</chem>        | M14 |
| 397 | 2,6-Naphthalenedi carboxylic Acid | diethylene glycol        |      |      |      | 1:1 | <chem>{O=C(O)c1ccc2c(c1)ccc2C(=O)OCCOCCO}</chem> | M14 |
| 398 | glutaric acid                     | diethylene glycol        | 1.76 | 3.18 | 1.81 | 1:1 | <chem>{O=C(O)CCCC(=O)OCCOCCO}</chem>             | M14 |
| 399 | 2,2'-Thiodiacetic acid            | diethylene glycol        |      |      |      | 1:1 | <chem>{O=C(O)CSCC(=O)OCCOCCO}</chem>             | M20 |
| 400 | isophthalic acid                  | diethylene glycol        |      |      |      | 1:1 | <chem>{O=C(O)c1ccc(cc1)C(=O)OCCOCCO}</chem>      | M14 |

Supplementary Dataset S4: Polymer Library Members

|     |                                   |                          |      |      |      |     |                                                           |     |
|-----|-----------------------------------|--------------------------|------|------|------|-----|-----------------------------------------------------------|-----|
| 401 | Suberic acid                      | diethylene glycol        |      |      |      | 1:1 | <chem>{[O=C]C(=O)CCCCC(=O)[O]COC(=O)CO}</chem>            | M14 |
| 402 | Adipic acid                       | diethylene glycol        | 7.18 | 8.82 | 1.23 | 1:1 | <chem>{[O=C]C(=O)CCCC(=O)[O]COC(=O)CO}</chem>             | M14 |
| 403 | azelaic acid                      | 2-Methyl-1,3-propanediol |      |      |      | 1:1 | <chem>{[O=C]C(=O)CCCCCCC(=O)[O]COC(C)CO}</chem>           | M3  |
| 404 | azelaic acid                      | triethylene glycol       |      |      |      | 1:1 | <chem>{[O=C]C(=O)CCCCCCC(=O)[O]COC(=O)CO}</chem>          | M14 |
| 405 | Sebacic Acid                      | triethylene glycol       | 1.79 | 3.51 | 1.96 | 1:1 | <chem>{[O=C]C(=O)CCCCCCCC(=O)[O]COC(=O)CO}</chem>         | M14 |
| 406 | 1,4-Cyclohexanedi carboxylic acid | triethylene glycol       |      |      |      | 1:1 | <chem>{[O=C]C(=O)C1CCCC1C(=O)[O]COC(=O)CO}</chem>         | M20 |
| 407 | 2,6-Naphthalenedi carboxylic Acid | triethylene glycol       |      |      |      | 1:1 | <chem>{[O=C]C(=O)c1ccc2cc1ccc2C(=O)[O]COC(=O)CO}</chem>   | M14 |
| 408 | 2,2'-Thiodiacetic acid            | triethylene glycol       |      |      |      | 1:1 | <chem>{[O=C]C(=O)CSCC(=O)[O]COC(=O)CO}</chem>             | M14 |
| 409 | 1,4-Cyclohexanedi carboxylic acid | 2-Methyl-1,3-propanediol |      |      |      | 1:1 | <chem>{[O=C]C(=O)C1CCCC1C(=O)[O]COC(C)CO}</chem>          | M3  |
| 410 | Suberic acid                      | triethylene glycol       | 1.35 | 2.42 | 1.80 | 1:1 | <chem>{[O=C]C(=O)CCCCC(=O)[O]COC(=O)CO}</chem>            | M14 |
| 411 | Adipic acid                       | triethylene glycol       | 7.44 | 9.31 | 1.25 | 1:1 | <chem>{[O=C]C(=O)CCCC(=O)[O]COC(=O)CO}</chem>             | M14 |
| 412 | pimelic acid                      | tripropylene glycol      |      |      |      | 1:1 | <chem>{[O=C]C(=O)CCCCC(=O)[O]COC(C)COC(C)COC(C)CO}</chem> | M15 |

Supplementary Dataset S4: Polymer Library Members

|     |                                   |                     |      |      |      |     |                                                                      |     |
|-----|-----------------------------------|---------------------|------|------|------|-----|----------------------------------------------------------------------|-----|
| 413 | azelaic acid                      | tripropylene glycol | 1.47 | 2.55 | 1.73 | 1:1 | <chem>{[C(=O)CCCCCCCC(=O)[C],C]OC(C)CO C(C)COC(C)CO[&gt;]}</chem>    | M15 |
| 414 | Sebacic Acid                      | tripropylene glycol | 1.73 | 2.98 | 1.72 | 1:1 | <chem>{[C(=O)CCCCCCCCC(=O)[C],C]OC(C)C OC(C)COC(C)CO[&gt;]}</chem>   | M15 |
| 415 | 1,4-Cyclohexanedi carboxylic acid | tripropylene glycol | 0.89 | 1.68 | 1.89 | 1:1 | <chem>{[C(=O)C(CC1)CCC1C(=O)[C],C]OC(C)C OC(C)COC(C)CO[&gt;]}</chem> | M15 |
| 416 | glutaric acid                     | tripropylene glycol | 0.88 | 1.67 | 1.89 | 1:1 | <chem>{[C(=O)CCCC(=O)[C],C]OC(C)COC(C)C OC(C)CO[&gt;]}</chem>        | M15 |
| 417 | 2,2'-Thiodiacetic acid            | tripropylene glycol | 1.01 | 1.58 | 1.57 | 1:1 | <chem>{[C(=O)CSCC(=O)[C],C]OC(C)COC(C)C OC(C)CO[&gt;]}</chem>        | M15 |
| 418 | Suberic acid                      | tripropylene glycol |      |      |      | 1:1 | <chem>{[C(=O)CCCCCCC(=O)[C],C]OC(C)COC( C)COC(C)CO[&gt;]}</chem>     | M15 |
| 419 | Succinic acid                     | tripropylene glycol | 0.95 | 1.68 | 1.76 | 1:1 | <chem>{[C(=O)CCC(=O)[C],C]OC(C)COC(C)CO C(C)CO[&gt;]}</chem>         | M15 |
| 420 | azelaic acid                      | dipropylene glycol  | 1.41 | 2.51 | 1.78 | 1:1 | <chem>{[C(=O)CCCCCCCC(=O)[C],C]OCC(C)O CC(C)O[&gt;]}</chem>          | M15 |
| 421 | Sebacic Acid                      | dipropylene glycol  | 1.46 | 2.59 | 1.78 | 1:1 | <chem>{[C(=O)CCCCCCCCC(=O)[C],C]OCC(C) OCC(C)O[&gt;]}</chem>         | M15 |
| 422 | 1,4-Cyclohexanedi carboxylic acid | dipropylene glycol  | 0.76 | 1.32 | 1.74 | 1:1 | <chem>{[C(=O)C(CC1)CCC1C(=O)[C],C]OCC(C) OCC(C)O[&gt;]}</chem>       | M15 |
| 423 | 2,6-Naphthalenedi carboxylic Acid | dipropylene glycol  |      |      |      | 1:1 | <chem>{[C(=O)c(ccc1c2)cc1ccc2C(=O)[C],C]OC C(C)OCC(C)O[&gt;]}</chem> | M15 |

Supplementary Dataset S4: Polymer Library Members

|     |                                        |                             |      |      |      |     |                                                                    |     |
|-----|----------------------------------------|-----------------------------|------|------|------|-----|--------------------------------------------------------------------|-----|
| 424 | glutaric acid                          | dipropylene glycol          | 0.88 | 1.61 | 1.84 | 1:1 | <chem>{[O=C]C(=O)CCCC(=O)[O-],[O+]OCC(C)OCC(C)O[O-]}</chem>        | M15 |
| 425 | 2,2'-Thiodiacetic acid                 | dipropylene glycol          | 1.06 | 1.78 | 1.68 | 1:1 | <chem>{[O=C]C(=O)CSCC(=O)[O-],[O+]OCC(C)OCC(C)O[O-]}</chem>        | M15 |
| 426 | diglycolic acid                        | dipropylene glycol          | 0.58 | 0.67 | 1.15 | 1:1 | <chem>{[O=C]C(=O)COC(=O)[O-],[O+]OCC(C)OCC(C)O[O-]}</chem>         | M15 |
| 427 | adipic acid                            | dipropylene glycol          |      |      |      | 1:1 | <chem>{[O=C]C(=O)CCCCC(=O)[O-],[O+]OCC(C)OCC(C)O[O-]}</chem>       | M21 |
| 428 | isophthalic acid                       | 2,2-Diethyl-1,3-propanediol |      |      |      | 1:1 | <chem>{[O=C]C(=O)c(ccc1)cc1C(=O)[O-],[O+]OCC(CC)(CC)CO[O-]}</chem> | M18 |
| 429 | azelaic acid                           | 2,2'-Thiodiethanol          | 1.19 | 1.96 | 1.64 | 1:1 | <chem>{[O=C]C(=O)CCCCCCCC(=O)[O-],[O+]OCCSCCO[O-]}</chem>          | M16 |
| 430 | Sebacic Acid                           | 2,2'-Thiodiethanol          |      |      |      | 1:1 | <chem>{[O=C]C(=O)CCCCCCCCC(=O)[O-],[O+]OCCSCCO[O-]}</chem>         | M16 |
| 431 | 1,4-Cyclohexanedi carboxylic acid      | 2,2'-Thiodiethanol          |      |      |      | 1:1 | <chem>{[O=C]C(=O)C(CC1)CCC1C(=O)[O-],[O+]OCCSCCO[O-]}</chem>       | M16 |
| 432 | glutaric acid                          | 2,2'-Thiodiethanol          | 1.62 | 2.80 | 1.72 | 1:1 | <chem>{[O=C]C(=O)CCCC(=O)[O-],[O+]OCCSCCO[O-]}</chem>              | M16 |
| 433 | 2,2'-Thiodiacetic acid                 | 2,2'-Thiodiethanol          | 0.92 | 1.74 | 1.89 | 1:1 | <chem>{[O=C]C(=O)CSCC(=O)[O-],[O+]OCCSCCO[O-]}</chem>              | M16 |
| 434 | 2,2'-[ethylenebis(oxy)] bisacetic acid | 2,2'-Thiodiethanol          |      |      |      | 1:1 | <chem>{[O=C]C(=O)COCCOCC(=O)[O-],[O+]OCCSCCO[O-]}</chem>           | M16 |
| 435 | diglycolic acid                        | 2,2'-Thiodiethanol          |      |      |      | 1:1 | <chem>{[O=C]C(=O)COC(=O)[O-],[O+]OCCSCCO[O-]}</chem>               | M21 |

Supplementary Dataset S4: Polymer Library Members

|     |                                     |                         |      |      |      |     |                                                                      |     |
|-----|-------------------------------------|-------------------------|------|------|------|-----|----------------------------------------------------------------------|-----|
| 436 | isophthalic acid                    | 2,2'-Thiodiethanol      |      |      |      | 1:1 | <chem>{[O=C]c(ccc1)cc1C(=O)[O-],[O-]OCCSCCO[O-]}</chem>              | M16 |
| 437 | Adipic acid                         | 2,2'-Thiodiethanol      | 1.86 | 3.22 | 1.73 | 1:1 | <chem>{[O=C]CCCC(=O)[O-],[O-]OCCSCCO[O-]}</chem>                     | M16 |
| 438 | glutaric acid                       | 1,4-Cyclohexanediol     |      |      |      | 1:1 | <chem>{[O=C]CCCC(=O)[O-],[O-]OC(CC1)CCC1O[O-]}</chem>                | M3  |
| 439 | Succinic acid                       | 2,2'-Thiodiethanol      | 0.81 | 1.41 | 1.74 | 1:1 | <chem>{[O=C]CC(=O)[O-],[O-]OCCSCCO[O-]}</chem>                       | M16 |
| 440 | azelaic acid                        | Guaiacol glyceryl ether |      |      |      | 1:1 | <chem>{[O=C]CCCCCCC(=O)[O-],[O-]OCC(COC(CCCC1)C1OC)O[O-]}</chem>     | M16 |
| 441 | Sebacic Acid                        | Guaiacol glyceryl ether |      |      |      | 1:1 | <chem>{[O=C]CCCCCCCC(=O)[O-],[O-]OCC(COC(CCCC1)C1OC)O[O-]}</chem>    | M16 |
| 442 | 1,4-Cyclohexanediol carboxylic acid | Guaiacol glyceryl ether |      |      |      | 1:1 | <chem>{[O=C]C(CC1)CCC1C(=O)[O-],[O-]OCC(COC(CCCC1)C1OC)O[O-]}</chem> | M16 |
| 443 | glutaric acid                       | Guaiacol glyceryl ether | 5.28 | 5.84 | 1.11 | 1:1 | <chem>{[O=C]CCCC(=O)[O-],[O-]OCC(COC(CCC1)C1OC)O[O-]}</chem>         | M16 |
| 444 | 2,2'-Thiodiacetic acid              | Guaiacol glyceryl ether |      |      |      | 1:1 | <chem>{[O=C]CSCC(=O)[O-],[O-]OCC(COC(CCC1)C1OC)O[O-]}</chem>         | M16 |
| 445 | [ethylenebis(oxy)] bisacetic acid   | Guaiacol glyceryl ether |      |      |      | 1:1 | <chem>{[O=C]COCCOCC(=O)[O-],[O-]OCC(COC(CCCC1)C1OC)O[O-]}</chem>     | M16 |
| 446 | Diglycolic acid                     | Guaiacol glyceryl ether |      |      |      | 1:1 | <chem>{[O=C]COC(=O)[O-],[O-]OCC(COC(CCCC1)C1OC)O[O-]}</chem>         | M16 |
| 447 | Adipic acid                         | Guaiacol glyceryl ether | 4.83 | 5.13 | 1.06 | 1:1 | <chem>{[O=C]CCCC(=O)[O-],[O-]OCC(COC(CCC1)C1OC)O[O-]}</chem>         | M16 |

Supplementary Dataset S4: Polymer Library Members

|     |                                        |                          |      |      |      |     |                                                         |     |
|-----|----------------------------------------|--------------------------|------|------|------|-----|---------------------------------------------------------|-----|
| 448 | pimelic acid                           | 1,4-Cyclohexanediol      |      |      |      | 1:1 | <chem>{[O][C(=O)CCCCC(=O)[O][C(C1)CCC1O]}</chem>        | M3  |
| 449 | Succinic acid                          | Guaiacol glyceryl ether  | 4.63 | 4.82 | 1.04 | 1:1 | <chem>{[O][C(=O)CCC(=O)[O]OCC(COC(CCCC1)C1OC)O]}</chem> | M16 |
| 450 | azelaic acid                           | 1,4-dithiane-2,5-diol    |      |      |      | 1:1 | <chem>{[O][C(=O)CCCCCCCC(=O)[O][C(CS1)SCC1O]}</chem>    | M17 |
| 451 | 1,4-Cyclohexanediol carboxylic acid    | 1,4-dithiane-2,5-diol    |      |      |      | 1:1 | <chem>{[O][C(=O)C(C1)CCC1C(=O)[O][C(CS1)SCC1O]}</chem>  | M21 |
| 452 | glutaric acid                          | 1,4-dithiane-2,5-diol    |      |      |      | 1:1 | <chem>{[O][C(=O)CCCC(=O)[O][C(CS1)SCC1O]}</chem>        | M17 |
| 453 | 2,2'-Thiodiacetic acid                 | 1,4-dithiane-2,5-diol    |      |      |      | 1:1 | <chem>{[O][C(=O)CSCC(=O)[O][C(CS1)SCC1O]}</chem>        | M17 |
| 454 | 2,2'-[ethylenebis(oxy)] bisacetic acid | 1,4-dithiane-2,5-diol    |      |      |      | 1:1 | <chem>{[O][C(=O)COCCOCC(=O)[O][C(CS1)SCC1O]}</chem>     | M17 |
| 455 | Diglycolic acid                        | 1,4-dithiane-2,5-diol    |      |      |      | 1:1 | <chem>{[O][C(=O)COC(=O)[O][C(CS1)SCC1O]}</chem>         | M17 |
| 456 | isophthalic acid                       | 1,4-dithiane-2,5-diol    |      |      |      | 1:1 | <chem>{[O][C(=O)c(ccc1)cc1C(=O)[O][C(CS1)SCC1O]}</chem> | M17 |
| 457 | adipic acid                            | 1,4-dithiane-2,5-diol    |      |      |      | 1:1 | <chem>{[O][C(=O)CCCCC(=O)[O][C(CS1)SCC1O]}</chem>       | M21 |
| 458 | pimelic acid                           | 3-methyl-1,5-pentanediol |      |      |      | 1:1 | <chem>{[O][C(=O)CCCCC(=O)[O]OCC(C)CO]}</chem>           | M3  |
| 459 | Succinic acid                          | 1,4-dithiane-2,5-diol    |      |      |      | 1:1 | <chem>{[O][C(=O)CCC(=O)[O][C(CS1)SCC1O]}</chem>         | M17 |

Supplementary Dataset S4: Polymer Library Members

|     |                                 |                                                               |     |                                                                             |     |
|-----|---------------------------------|---------------------------------------------------------------|-----|-----------------------------------------------------------------------------|-----|
| 460 | quinoline-2,4-dicarboxylic acid | tripropylene glycol                                           | 1:1 | <chem>{[O=C]c1nc2ccccc2c(c1)C(=O)[O]OC(C)COC(C)CO&gt;}</chem>               | M22 |
| 461 | quinoline-2,4-dicarboxylic acid | 4,4'-Isopropylidenedicyclohexanol, mixture of isomers         | 1:1 | <chem>{[O=C]c1nc2ccccc2c(c1)C(=O)[O]OC(C1)CCC1C(C)(C)C(C2)CCC2O&gt;}</chem> | M22 |
| 462 | quinoline-2,4-dicarboxylic acid | 1,4-Cyclohexanediol                                           | 1:1 | <chem>{[O=C]c1nc2ccccc2c(c1)C(=O)[O]OC(C1)CCC1O&gt;}</chem>                 | M22 |
| 463 | quinoline-2,4-dicarboxylic acid | 2,2,4-Trimethyl-1,3-pentanediol                               | 1:1 | <chem>{[O=C]c1nc2ccccc2c(c1)C(=O)[O]OC(C)(C)C(C(C)C)O&gt;}</chem>           | M22 |
| 464 | quinoline-2,4-dicarboxylic acid | 2,2-Dimethyl-1,3-propanediol                                  | 1:1 | <chem>{[O=C]c1nc2ccccc2c(c1)C(=O)[O]OC(C)(C)CO&gt;}</chem>                  | M22 |
| 465 | quinoline-2,4-dicarboxylic acid | 2-Methyl-1,3-propanediol                                      | 1:1 | <chem>{[O=C]c1nc2ccccc2c(c1)C(=O)[O]OC(C)CO&gt;}</chem>                     | M22 |
| 466 | quinoline-2,4-dicarboxylic acid | 1,2-Propanediol                                               | 1:1 | <chem>{[O=C]c1nc2ccccc2c(c1)C(=O)[O]OC(C)O&gt;}</chem>                      | M22 |
| 467 | quinoline-2,4-dicarboxylic acid | 4,8-Bis(hydroxymethyl)tricyclo[5.2.1.0 <sup>2,6</sup> ]decane | 1:1 | <chem>{[O=C]c1nc2ccccc2c(c1)C(=O)[O]OC(C(C1)C2C3)C1C2CC3CO&gt;}</chem>      | M22 |
| 468 | quinoline-2,4-dicarboxylic acid | 2,2-Diethyl-1,3-propanediol                                   | 1:1 | <chem>{[O=C]c1nc2ccccc2c(c1)C(=O)[O]OC(C(C)C)C(C)CO&gt;}</chem>             | M22 |
| 469 | 2,2'-Thiodiacetic acid          | 1,4-Cyclohexanediol                                           | 1:1 | <chem>{[O=C]C(=O)CSCC(=O)[O]OC(C1)CCC1O&gt;}</chem>                         | M4  |
| 470 | quinoline-2,4-dicarboxylic acid | 2-Butyl-2-ethyl-1,3-propanediol                               | 1:1 | <chem>{[O=C]c1nc2ccccc2c(c1)C(=O)[O]OC(C(C)C)C(C)CO&gt;}</chem>             | M22 |

Supplementary Dataset S4: Polymer Library Members

|     |                                 |                             |       |       |      |     |                                                        |     |
|-----|---------------------------------|-----------------------------|-------|-------|------|-----|--------------------------------------------------------|-----|
| 471 | quinoline-2,4-dicarboxylic acid | 1,10-decanediol             |       |       |      | 1:1 | <chem>{[O=C]c1nc2cccc2c(c1)C(=O)[O]CCCCCCCCO}</chem>   | M22 |
| 472 | quinoline-2,4-dicarboxylic acid | 1,9-nonanediol              |       |       |      | 1:1 | <chem>{[O=C]c1nc2cccc2c(c1)C(=O)[O]CCCCCCC}</chem>     | M23 |
| 473 | quinoline-2,4-dicarboxylic acid | 1,8-octanediol              |       |       |      | 1:1 | <chem>{[O=C]c1nc2cccc2c(c1)C(=O)[O]CCCCCCC}</chem>     | M23 |
| 474 | quinoline-2,4-dicarboxylic acid | 1,6-Hexanediol              |       |       |      | 1:1 | <chem>{[O=C]c1nc2cccc2c(c1)C(=O)[O]CCCCO}</chem>       | M23 |
| 475 | quinoline-2,4-dicarboxylic acid | 1,5-pentanediol             |       |       |      | 1:1 | <chem>{[O=C]c1nc2cccc2c(c1)C(=O)[O]CCCCO}</chem>       | M23 |
| 476 | quinoline-2,4-dicarboxylic acid | 1,3-Propanediol             |       |       |      | 1:1 | <chem>{[O=C]c1nc2cccc2c(c1)C(=O)[O]CCO}</chem>         | M23 |
| 477 | quinoline-2,4-dicarboxylic acid | ethylene glycol             |       |       |      | 1:1 | <chem>{[O=C]c1nc2cccc2c(c1)C(=O)[O]CO}</chem>          | M23 |
| 478 | azelaic acid                    | 1,4-Cyclohexanediol         |       |       |      | 1:1 | <chem>{[O=C]CCCCCCC(=O)[O]OC(C1)CC1O}</chem>           | M4  |
| 479 | quinoline-2,4-dicarboxylic acid | 2,2-Diethyl-1,3-propanediol |       |       |      | 1:1 | <chem>{[O=C]c1nc2cccc2c(c1)C(=O)[O]C(CC)(CC)CO}</chem> | M23 |
| 480 | quinoline-2,4-dicarboxylic acid | triethylene glycol          |       |       |      | 1:1 | <chem>{[O=C]c1nc2cccc2c(c1)C(=O)[O]COCCOCCO}</chem>    | M23 |
| 481 | quinoline-2,4-dicarboxylic acid | 3-methyl-1,5-pentanediol    |       |       |      | 1:1 | <chem>{[O=C]c1nc2cccc2c(c1)C(=O)[O]CC(C)CCO}</chem>    | M23 |
| 482 | 2,5-furandicarboxylic acid      | 1,5-pentanediol             | 12.00 | 17.57 | 1.47 | 1:1 | <chem>{[O=C]O=C(O)c1oc(C(=O)O)cc1OCCCCO}</chem>        | M24 |



Supplementary Dataset S4: Polymer Library Members

|     |                                          |                             |       |       |      |     |                                                     |     |
|-----|------------------------------------------|-----------------------------|-------|-------|------|-----|-----------------------------------------------------|-----|
| 483 | 2,5-furandicarboxylic acid               | 1,4-butanediol              |       |       |      | 1:1 | <chem>{O=C(O)c1oc(C(=O)O)cc1.[O]CCCCO}</chem>       | M24 |
| 484 | 2,5-furandicarboxylic acid               | 1,6-hexanediol              |       |       |      | 1:1 | <chem>{O=C(O)c1oc(C(=O)O)cc1.[O]CCCCCO}</chem>      | M24 |
| 485 | 2,5-furandicarboxylic acid               | ethylene glycol             |       |       |      | 1:1 | <chem>{O=C(O)c1oc(C(=O)O)cc1.[O]CCO}</chem>         | M24 |
| 486 | 2,5-furandicarboxylic acid               | 1,3-Propanediol             |       |       |      | 1:1 | <chem>{O=C(O)c1oc(C(=O)O)cc1.[O]CCCO}</chem>        | M24 |
| 487 | 2,5-furandicarboxylic acid               | 2-Methyl-1,3-propanediol    |       |       |      | 1:1 | <chem>{O=C(O)c1oc(C(=O)O)cc1.[O]CC(C)CO}</chem>     | M24 |
| 488 | Sebacic Acid                             | 1,4-Cyclohexanediol         |       |       |      | 1:1 | <chem>{C(=O)CCCCCCCC(=O).[O]C(CC1)CCC1O}</chem>     | M4  |
| 489 | 2,5-furandicarboxylic acid               | 1,4-Cyclohexanediol         |       |       |      | 1:1 | <chem>{O=C(O)c1oc(C(=O)O)cc1.[O]C(CC1)CCC1O}</chem> | M24 |
| 490 | Diglycolic acid                          | 1,4-cyclohexanediol         |       |       |      | 1:1 | <chem>{C(=O)COC(=O).[O]C(CC1)CCC1O}</chem>          | M18 |
| 491 | [(Carboxymethyl)(methylamino)acetic acid | 1,4-Cyclohexanediol         |       |       |      | 1:1 | <chem>{C(=O)CN(C)CC(=O).[O]C(CC1)CCC1O}</chem>      | M4  |
| 492 | glutaric acid                            | 2,2-Diethyl-1,3-propanediol | 13.74 | 20.19 | 1.47 | 1:1 | <chem>{C(=O)CCCC(=O).[O]C(CC)(CC)CO}</chem>         | M4  |
| 493 | pimelic acid                             | 2,2-Diethyl-1,3-propanediol |       |       |      | 1:1 | <chem>{C(=O)CCCCC(=O).[O]C(CC)(CC)CO}</chem>        | M4  |
| 494 | 2,2'-Thiodiacetic acid                   | 2,2-Diethyl-1,3-propanediol | 11.04 | 17.95 | 1.63 | 1:1 | <chem>{C(=O)CSCC(=O).[O]C(CC)(CC)CO}</chem>         | M4  |

Supplementary Dataset S4: Polymer Library Members

|     |                                          |                                                               |     |                                                                       |     |
|-----|------------------------------------------|---------------------------------------------------------------|-----|-----------------------------------------------------------------------|-----|
| 495 | Sebacic Acid                             | 2,2-Diethyl-1,3-propanediol                                   | 1:1 | <chem>{[C@H]1C(=O)CCCCCCCC(=O)[C@H]1OCC(CC)(CC)CO}</chem>             | M4  |
| 496 | 1,4-Cyclohexanedicarboxylic acid         | 2,2-Diethyl-1,3-propanediol                                   | 1:1 | <chem>{[C@H]1C(=O)C(CCC1)CCC1C(=O)[C@H]1OCC(CC)(CC)CO}</chem>         | M4  |
| 497 | [(Carboxymethyl)(methylamino)acetic acid | 2,2-Diethyl-1,3-propanediol                                   | 1:1 | <chem>{[C@H]1C(=O)CN(C)CC(=O)[C@H]1OCC(CC)(CC)CO}</chem>              | M18 |
| 498 | glutaric acid                            | 4,8-Bis(hydroxymethyl)tricyclo[5.2.1.0 <sup>2,6</sup> ]decane | 1:1 | <chem>{[C@H]1C(=O)CCCC(=O)[C@H]1OCC(CC(C1)C2C3)C1C2CC3CO}</chem>      | M5  |
| 499 | pimelic acid                             | 4,8-Bis(hydroxymethyl)tricyclo[5.2.1.0 <sup>2,6</sup> ]decane | 1:1 | <chem>{[C@H]1C(=O)CCCCC(=O)[C@H]1OCC(CC(C1)C2C3)C1C2CC3CO}</chem>     | M5  |
| 500 | isophthalic acid                         | 2-Butyl-2-ethyl-1,3-propanediol                               | 1:1 | <chem>{[C@H]1C(=O)c(ccc1)cc1C(=O)[C@H]1OCC(CC)(CCCC)CO}</chem>        | M2  |
| 501 | 2,2'-Thiodiacetic acid                   | 4,8-Bis(hydroxymethyl)tricyclo[5.2.1.0 <sup>2,6</sup> ]decane | 1:1 | <chem>{[C@H]1C(=O)CSCC(=O)[C@H]1OCC(CC(C1)C2C3)C1C2CC3CO}</chem>      | M5  |
| 502 | azelaic acid                             | 4,8-Bis(hydroxymethyl)tricyclo[5.2.1.0 <sup>2,6</sup> ]decane | 1:1 | <chem>{[C@H]1C(=O)CCCCCCCC(=O)[C@H]1OCC(CC(C1)C2C3)C1C2CC3CO}</chem>  | M5  |
| 503 | Sebacic Acid                             | 4,8-Bis(hydroxymethyl)tricyclo[5.2.1.0 <sup>2,6</sup> ]decane | 1:1 | <chem>{[C@H]1C(=O)CCCCCCCCC(=O)[C@H]1OCC(CC(C1)C2C3)C1C2CC3CO}</chem> | M5  |
| 504 | [(Carboxymethyl)(methylamino)acetic acid | 4,8-Bis(hydroxymethyl)tricyclo[5.2.1.0 <sup>2,6</sup> ]decane | 1:1 | <chem>{[C@H]1C(=O)CN(C)CC(=O)[C@H]1OCC(CC(C1)C2C3)C1C2CC3CO}</chem>   | M19 |

Supplementary Dataset S4: Polymer Library Members

|     |                                        |                                                               |       |       |      |     |                                                           |     |
|-----|----------------------------------------|---------------------------------------------------------------|-------|-------|------|-----|-----------------------------------------------------------|-----|
| 505 | 2,6-Naphthalenedicarboxylic Acid       | 4,8-Bis(hydroxymethyl)tricyclo[5.2.1.0 <sup>2,6</sup> ]decane |       |       |      | 1:1 | <chem>{[O=C]c1ccc(cc1)C(=O)OC(C(C1)C2C3)C1C2CC3CO}</chem> | M19 |
| 506 | 2,2'-[ethylenebis(oxy)] bisacetic acid | 2-Methyl-1,3-propanediol                                      |       |       |      | 1:1 | <chem>{[O=C]COCCOCC(=O)OCC(C)CO}</chem>                   | M6  |
| 507 | isophthalic acid                       | 2,2,4-Trimethyl-1,3-pentanediol                               |       |       |      | 1:1 | <chem>{[O=C]c1ccc(cc1)C(=O)OCC(C)(C)C(C(C)C)O}</chem>     | M2  |
| 508 | 2,2'-[ethylenebis(oxy)] bisacetic acid | 3-methyl-1,5-pentanediol                                      | 13.17 | 19.98 | 1.52 | 1:1 | <chem>{[O=C]COCCOCC(=O)OCCC(C)CO}</chem>                  | M6  |
| 509 | 2,2'-[ethylenebis(oxy)] bisacetic acid | 1,4-Cyclohexanediol                                           | 6.32  | 8.57  | 1.36 | 1:1 | <chem>{[O=C]COCCOCC(=O)OC(CC1)CC1O}</chem>                | M6  |
| 510 | 2,2'-[ethylenebis(oxy)] bisacetic acid | 2,2-Diethyl-1,3-propanediol                                   |       |       |      | 1:1 | <chem>{[O=C]COCCOCC(=O)OCC(CC)(C)CO}</chem>               | M6  |
| 511 | 2,2'-[ethylenebis(oxy)] bisacetic acid | 4,8-Bis(hydroxymethyl)tricyclo[5.2.1.0 <sup>2,6</sup> ]decane | 7.31  | 10.36 | 1.42 | 1:1 | <chem>{[O=C]COCCOCC(=O)OCC(CC(C1)C2C3)C1C2CC3CO}</chem>   | M6  |
| 512 | 1,4-Cyclohexanedicarboxylic acid       | 2,3-Butanediol                                                |       |       |      | 1:1 | <chem>{[O=C]C(CC1)CCC1C(=O)OC(C)C(C)O}</chem>             | M6  |
| 513 | Diglycolic acid                        | 2,3-Butanediol                                                |       |       |      | 1:1 | <chem>{[O=C]COC(=O)OCC(C)C(C)O}</chem>                    | M6  |
| 514 | glutaric acid                          | 2-Butyl-2-ethyl-1,3-propanediol                               |       |       |      | 1:1 | <chem>{[O=C]CCCC(=O)OCC(CC)(CCCC)CO}</chem>               | M7  |
| 515 | pimelic acid                           | 2-Butyl-2-ethyl-1,3-propanediol                               | 5.94  | 7.83  | 1.32 | 1:1 | <chem>{[O=C]CCCCC(=O)OCC(CC)(CC)CO}</chem>                | M7  |

Supplementary Dataset S4: Polymer Library Members

|     |                                           |                                 |      |       |      |     |                                                                            |     |
|-----|-------------------------------------------|---------------------------------|------|-------|------|-----|----------------------------------------------------------------------------|-----|
| 516 | azelaic acid                              | 2-Butyl-2-ethyl-1,3-propanediol | 5.21 | 6.53  | 1.26 | 1:1 | <chem>{[C(=O)CCCCCCCC(=O)[C],&gt;]OCC(CC)(CCCC)CO[&gt;]}</chem>            | M7  |
| 517 | isophthalic acid                          | 2,2-Dimethyl-1,3-propanediol    |      |       |      | 1:1 | <chem>{[C(=O)c(ccc1)cc1C(=O)[C],&gt;]OCC(C)(C)CO[&gt;]}</chem>             | M2  |
| 518 | Sebacic Acid                              | 2-Butyl-2-ethyl-1,3-propanediol | 5.70 | 7.75  | 1.36 | 1:1 | <chem>{[C(=O)CCCCCCCCC(=O)[C],&gt;]OCC(CC)(CCCC)CO[&gt;]}</chem>           | M7  |
| 519 | 2,2'-[ethylenebis(oxy)] bisacetic acid    | 2-Butyl-2-ethyl-1,3-propanediol | 7.42 | 10.86 | 1.46 | 1:1 | <chem>{[C(=O)COCCOCC(=O)[C],&gt;]OCC(CC)(CCC)CO[&gt;]}</chem>              | M7  |
| 520 | 2,6-Naphthalenedicarboxylic Acid          | 2-Butyl-2-ethyl-1,3-propanediol |      |       |      | 1:1 | <chem>{[C(=O)c(ccc1c2)cc1ccc2C(=O)[C],&gt;]OC(C)(CC)(CCCC)CO[&gt;]}</chem> | M19 |
| 521 | 2,2'-Thiodiacetic acid                    | 2,2-Dimethyl-1,3-propanediol    |      |       |      | 1:1 | <chem>{[C(=O)CSCC(=O)[C],&gt;]OCC(C)(C)CO[&gt;]}</chem>                    | M19 |
| 522 | 2,2'-[ethylenebis(oxy)] bisacetic acid    | 2,2-Dimethyl-1,3-propanediol    | 7.77 | 11.28 | 1.45 | 1:1 | <chem>{[C(=O)COCCOCC(=O)[C],&gt;]OCC(C)(C)CO[&gt;]}</chem>                 | M19 |
| 523 | [(Carboxymethyl)(methyl)amino]acetic acid | 2,2-Dimethyl-1,3-propanediol    |      |       |      | 1:1 | <chem>{[C(=O)CN(C)CC(=O)[C],&gt;]OCC(C)(C)CO[&gt;]}</chem>                 | M19 |
| 524 | 2,2'-Thiodiacetic acid                    | 1,3-Propanediol                 |      |       |      | 1:1 | <chem>{[C(=O)CSCC(=O)[C],&gt;]OCCCO[&gt;]}</chem>                          | M7  |
| 525 | 1,4-Cyclohexanedicarboxylic acid          | 1,3-Propanediol                 |      |       |      | 1:1 | <chem>{[C(=O)C(CC1)CCC1C(=O)[C],&gt;]OCCCO[&gt;]}</chem>                   | M7  |
| 526 | Sebacic Acid                              | 3-methyl-1,5-pentanediol        | 5.16 | 6.68  | 1.30 | 1:1 | <chem>{[C(=O)CCCCCCCCC(=O)[C],&gt;]OCCC(C)CCO[&gt;]}</chem>                | M8  |

Supplementary Dataset S4: Polymer Library Members

|     |                                   |                              |       |       |      |     |                                                   |     |
|-----|-----------------------------------|------------------------------|-------|-------|------|-----|---------------------------------------------------|-----|
| 527 | isophthalic acid                  | 1,4-Cyclohexanedim ethanol   |       |       |      | 1:1 | <chem>{O=C(O)c1ccc(cc1)CC1C(=O)OCC(C)C1CO}</chem> | M18 |
| 528 | azelaic acid                      | 2,2-Diethyl-1,3-propanediol  | 8.78  | 10.80 | 1.23 | 1:1 | <chem>{O=C(O)CCCCCCCC(=O)OCC(C)(CC)CO}</chem>     | M9  |
| 529 | azelaic acid                      | 2,3-Butanediol               |       |       |      | 1:1 | <chem>{O=C(O)CCCCCCCC(=O)OC(C)C(C)O}</chem>       | M9  |
| 530 | Sebacic Acid                      | 2,3-Butanediol               |       |       |      | 1:1 | <chem>{O=C(O)CCCCCCCCC(=O)OC(C)C(C)O}</chem>      | M8  |
| 531 | glutaric acid                     | 1,2-Propanediol              |       |       |      | 1:1 | <chem>{O=C(O)CCCC(=O)OCC(C)O}</chem>              | M9  |
| 532 | pimelic acid                      | 1,2-Propanediol              |       |       |      | 1:1 | <chem>{O=C(O)CCCCCC(=O)OCC(C)O}</chem>            | M9  |
| 533 | 2,2'-Thiodiacetic acid            | 1,2-Propanediol              |       |       |      | 1:1 | <chem>{O=C(O)CSCC(=O)OCC(C)O}</chem>              | M9  |
| 534 | azelaic acid                      | 1,2-Propanediol              |       |       |      | 1:1 | <chem>{O=C(O)CCCCCCCC(=O)OCC(C)O}</chem>          | M9  |
| 535 | Sebacic Acid                      | 1,2-Propanediol              |       |       |      | 1:1 | <chem>{O=C(O)CCCCCCCCC(=O)OCC(C)O}</chem>         | M8  |
| 536 | Sebacic Acid                      | ethylene glycol              |       |       |      | 1:1 | <chem>{O=C(O)CCCCCCCCC(=O)OCCO}</chem>            | M8  |
| 537 | 2,6-Naphthalenedi carboxylic Acid | ethylene glycol              |       |       |      | 1:1 | <chem>{O=C(O)c1ccc2c(c1)ccc2C(=O)OCCO}</chem>     | M19 |
| 538 | glutaric acid                     | 2,2-Dimethyl-1,3-propanediol | 16.56 | 25.53 | 1.54 | 1:1 | <chem>{O=C(O)CCCC(=O)OCC(C)(C)CO}</chem>          | M10 |
| 539 | pimelic acid                      | 2,2-Dimethyl-1,3-propanediol | 8.20  | 11.95 | 1.46 | 1:1 | <chem>{O=C(O)CCCCCC(=O)OCC(C)(C)CO}</chem>        | M10 |

Supplementary Dataset S4: Polymer Library Members

|     |                                        |                                                               |      |       |      |     |                                                                               |     |
|-----|----------------------------------------|---------------------------------------------------------------|------|-------|------|-----|-------------------------------------------------------------------------------|-----|
| 540 | azelaic acid                           | 2,2-Dimethyl-1,3-propanediol                                  | 7.46 | 11.21 | 1.50 | 1:1 | <chem>{[C(=O)CCCCCCCC(=O)[C],&gt;]OCC(C)(C)CO[&gt;]}</chem>                   | M10 |
| 541 | Sebacic Acid                           | 2,2-Dimethyl-1,3-propanediol                                  | 9.92 | 14.92 | 1.50 | 1:1 | <chem>{[C(=O)CCCCCCCCC(=O)[C],&gt;]OCC(C)(C)CO[&gt;]}</chem>                  | M8  |
| 542 | Sebacic Acid                           | 1,3-Propanediol                                               | 4.85 | 8.31  | 1.71 | 1:1 | <chem>{[C(=O)CCCCCCCCC(=O)[C],&gt;]OCCCO[&gt;]}</chem>                        | M8  |
| 543 | 2,2'-[ethylenebis(oxy)] bisacetic acid | 1,3-Propanediol                                               |      |       |      | 1:1 | <chem>{[C(=O)COCCOCC(=O)[C],&gt;]OCCCO[&gt;]}</chem>                          | M10 |
| 544 | 2,6-Naphthalenedicarboxylic Acid       | 1,3-Propanediol                                               |      |       |      | 1:1 | <chem>{[C(=O)c(ccc1c2)cc1ccc2C(=O)[C],&gt;]OCCCO[&gt;]}</chem>                | M19 |
| 545 | isophthalic acid                       | 4,8-Bis(hydroxymethyl)tricyclo[5.2.1.0 <sup>2,6</sup> ]decane |      |       |      | 1:1 | <chem>{[C(=O)c(ccc1)cc1C(=O)[C],&gt;]OCC(CC(C)C1)C2C3)C1C2CC3CO[&gt;]}</chem> | M2  |
| 546 | glutaric acid                          | 4,4'-Isopropylidenedicyclohexanol, mixture of isomers         |      |       |      | 1:1 | <chem>{[C(=O)CCCC(=O)[C],&gt;]OC(CC1)CCC1C(C)(C)C(CC2)CCC2O[&gt;]}</chem>     | M10 |
| 547 | 1,4-Cyclohexanedicarboxylic acid       | 1,2-Propanediol                                               | 0.92 | 1.66  | 1.81 | 1:1 | <chem>{[C(=O)C(CC1)CCC1C(=O)[C],&gt;]OCC(C)O[&gt;]}</chem>                    | M11 |
| 548 | 2,6-Naphthalenedicarboxylic Acid       | 1,2-Propanediol                                               |      |       |      | 1:1 | <chem>{[C(=O)c(ccc1c2)cc1ccc2C(=O)[C],&gt;]OCC(C)O[&gt;]}</chem>              | M11 |
| 549 | 2,2'-[ethylenebis(oxy)] bisacetic acid | 4,4'-Isopropylidenedicyclohexanol, mixture of isomers         | 1.40 | 3.09  | 2.21 | 1:1 | <chem>{[C(=O)COCCOCC(=O)[C],&gt;]OC(CC1)CCC1C(C)(C)C(CC2)CCC2O[&gt;]}</chem>  | M11 |

Supplementary Dataset S4: Polymer Library Members

|     |                                        |                                                       |       |       |      |       |                                                                                                                       |     |
|-----|----------------------------------------|-------------------------------------------------------|-------|-------|------|-------|-----------------------------------------------------------------------------------------------------------------------|-----|
| 550 | 2,6-Naphthalenedicarboxylic Acid       | 4,4'-Isopropylidenedicyclohexanol, mixture of isomers |       |       |      | 1:1   | <chem>{[*][&lt;]C(=O)c(ccc1c2)cc1ccc2C(=O)[&lt;],[&gt;]OC(CC1)CCC1C(C)(C)C(CC2)CCC2O[&gt;][*]}</chem>                 | M11 |
| 551 | glutaric acid                          | 2,2,4-Trimethyl-1,3-pentanediol                       |       |       |      | 1:1   | <chem>{[*][&lt;]C(=O)CCCC(=O)[&lt;],[&gt;]OCC(C)(C)C(C(C)C)O[&gt;][*]}</chem>                                         | M11 |
| 552 | 2,2'-Thiodiacetic acid                 | 2,2,4-Trimethyl-1,3-pentanediol                       |       |       |      | 1:1   | <chem>{[*][&lt;]C(=O)CSCC(=O)[&lt;],[&gt;]OCC(C)(C)C(C(C)C)O[&gt;][*]}</chem>                                         | M11 |
| 553 | 2,2'-[ethylenebis(oxy)] bisacetic acid | 2,2,4-Trimethyl-1,3-pentanediol                       |       |       |      | 1:1   | <chem>{[*][&lt;]C(=O)COCCOCC(=O)[&lt;],[&gt;]OCC(C)(C)C(C(C)C)O[&gt;][*]}</chem>                                      | M11 |
| 554 | ε-caprolactone                         |                                                       | 8.02  | 13.56 | 1.69 | NA    | <chem>{[*][&lt;]OCCCCC(=O)[&gt;][*]}</chem>                                                                           | M33 |
| 555 | undecanoic d-lactone                   | e-decalactone                                         |       |       |      | NR    | <chem>{[*][&lt;]OC(CCCCC)CCCC(=O)[&gt;],[&lt;]OC(CCCCC)CCCC(=O)[&gt;],[&lt;]OC(CCCCC)CCCC(=O)[&gt;][*]}</chem>        | M36 |
| 556 | d-nonalactone                          | e-decalactone                                         |       |       |      | NR    | <chem>{[*][&lt;]OC(CCCC)CCCC(=O)[&gt;],[&lt;]OC(CCCC)CCCC(=O)[&gt;],[&lt;]OC(CCCC)CCCC(=O)[&gt;][*]}</chem>           | M36 |
| 557 | pentadecanoliide                       | e-decalactone                                         |       |       |      | 1.8:1 | <chem>{[*][&lt;]OCCCCCCCCCCCCCCCC(=O)[&gt;],[&lt;]OCCCCCCCCCCCCCCCC(=O)[&gt;],[&lt;]OC(CCCC)CCCC(=O)[&gt;][*]}</chem> | M36 |
| 558 | β-butyrolactone                        | e-decalactone                                         | 14.91 | 26.11 | 1.75 | 1.1:1 | <chem>{[*][&lt;]OC(C)CC(=O)[&gt;],[&lt;]OC(C)CC(=O)[&gt;],[&lt;]OC(CCCC)CCCC(=O)[&gt;][*]}</chem>                     | M36 |

Supplementary Dataset S4: Polymer Library Members

|     |                     |                     |       |       |      |        |                                                                                                                                           |     |
|-----|---------------------|---------------------|-------|-------|------|--------|-------------------------------------------------------------------------------------------------------------------------------------------|-----|
| 559 | 5-dodecanolide      | e-decalactone       |       |       |      | NR     | { <chem>[*]OC(CCCCCC)CCCC(=O)[*]</chem> },<br>{ <chem>[*]OC(CCCCCC)CCCC(=O)[*]</chem> },<br>{ <chem>[*]OC(CCCC)CCCC(=O)[*]</chem> }       | M36 |
| 560 | 16-hexadecanolide   | e-decalactone       |       |       |      | 2.7:1  | { <chem>[*]OCCCCCCCCCCCCCCCC(=O)[*]</chem> },<br>{ <chem>[*]OCCCCCCCCCCCCCCCC(=O)[*]</chem> },<br>{ <chem>[*]OC(CCCC)CCCC(=O)[*]</chem> } | M36 |
| 561 | e-decalactone       | e-caprolactone      |       |       |      | 2:1    | { <chem>[*]OC(CCCC)CCCC(=O)[*]</chem> },<br>{ <chem>[*]OC(CCCC)CCCC(=O)[*]</chem> },<br>{ <chem>[*]OCCCCC(=O)[*]</chem> }                 | M36 |
| 562 | e-decalactone       | delta-valerolactone |       |       |      | 2.4:1  | { <chem>[*]OC(CCCC)CCCC(=O)[*]</chem> },<br>{ <chem>[*]OC(CCCC)CCCC(=O)[*]</chem> },<br>{ <chem>[*]OCCCCC(=O)[*]</chem> }                 | M36 |
| 563 | glycolide           | e-caprolactone      |       |       |      | 2:1    | { <chem>[*]OCC(=O)OCC(=O)[*]</chem> },<br>{ <chem>[*]OCC(=O)OCC(=O)[*]</chem> },<br>{ <chem>[*]OCCCCC(=O)[*]</chem> }                     | M34 |
| 564 | e-caprolactone      | e-decalactone       |       |       |      | 1.9:1  | { <chem>[*]OCCCCC(=O)[*]</chem> },<br>{ <chem>[*]OCCCCC(=O)[*]</chem> },<br>{ <chem>[*]OC(CCCC)CCCC(=O)[*]</chem> }                       | M36 |
| 565 | delta-valerolactone | e-decalactone       | 86.27 | 138.0 | 1.60 | 1.75:1 | { <chem>[*]OCCCCC(=O)[*]</chem> },<br>{ <chem>[*]OCCCCC(=O)[*]</chem> },<br>{ <chem>[*]OC(CCCC)CCCC(=O)[*]</chem> }                       | M36 |
| 566 | e-caprolactone      | massoia lactone     |       |       |      | 1:1    | { <chem>[*]OCCCCC(=O)[*]</chem> },<br>{ <chem>[*]OCCCCC(=O)[*]</chem> },<br>{ <chem>[*]OC(CCCC)CC=CC(O)[*]</chem> }                       | M36 |



Supplementary Dataset S4: Polymer Library Members

|     |                     |                 |      |      |      |       |                                                                                                                                         |     |
|-----|---------------------|-----------------|------|------|------|-------|-----------------------------------------------------------------------------------------------------------------------------------------|-----|
| 567 | e-caprolactone      | pentadecanolide |      |      |      | 6.6:1 | { <chem>[*]OCCCCC(=O)[*]</chem> },<br><chem>[*]OCCCCC(=O)[*]</chem> , <chem>[*]OCCCCCCCCCCC<br/>CCCC(=O)[*]</chem> }                    | M36 |
| 568 | e-caprolactone      | b-butyrolactone |      |      |      | 4.1:1 | { <chem>[*]OCCCCC(=O)[*]</chem> },<br><chem>[*]OCCCCC(=O)[*]</chem> , <chem>[*]OC(C)CC(=O)[*]</chem> }                                  | M36 |
| 569 | e-caprolactone      | glycolide       |      |      |      | 1:1   | { <chem>[*]OCCCCC(=O)[*]</chem> },<br><chem>[*]OCCCCC(=O)[*]</chem> , <chem>[*]OCC(=O)OCC(=O)[*]</chem> }                               | M34 |
| 570 | pentadecanolide     | e-caprolactone  |      |      |      | 1:1.1 | { <chem>[*]OCCCCCCCCCCCCCCCC(=O)[*]</chem> },<br><chem>[*]OCCCCCCCCCCCCCCCC(=O)[*]</chem> , <chem>[*]OCC<br/>CCCC(=O)[*]</chem> }       | M36 |
| 571 | b-butyrolactone     | e-caprolactone  |      |      |      | 1:0.9 | { <chem>[*]OC(C)CC(=O)[*]</chem> },<br><chem>[*]OC(C)CC(=O)[*]</chem> , <chem>[*]OCCCCC(=O)[*]</chem> }                                 | M36 |
| 572 | beta-propiolactone  |                 |      |      |      | NR    | { <chem>[*]OCCC(=O)[*]</chem> },<br><chem>[*]OCCC(=O)[*]</chem> , <chem>[*]OCCC(=O)[*]</chem> }                                         | M33 |
| 573 | pentadecanolide     | massoia lactone |      |      |      | 2:1   | { <chem>[*]OCCCCCCCCCCCCCCCC(=O)[*]</chem> },<br><chem>[*]OCCCCCCCCCCCCCCCC(=O)[*]</chem> , <chem>[*]OC(C<br/>CCCC)CC=CC(O)[*]</chem> } | M36 |
| 574 | 16-hexadecanolide   | massoia lactone |      |      |      | 1.7:1 | { <chem>[*]OCCCCCCCCCCCCCCCC(=O)[*]</chem> },<br><chem>[*]OCCCCCCCCCCCCCCCC(=O)[*]</chem> , <chem>[*]OC(<br/>CCCC)CC=CC(O)[*]</chem> }  | M36 |
| 575 | delta-valerolactone |                 | 2.49 | 3.78 | 1.52 | NR    | { <chem>[*]OCCCCC(=O)[*]</chem> },<br><chem>[*]OCCCCC(=O)[*]</chem> , <chem>[*]OCCCCC(=O)[*]</chem> }                                   | M33 |

Supplementary Dataset S4: Polymer Library Members

|     |                     |                     |      |      |      |        |                                                                                                                               |     |
|-----|---------------------|---------------------|------|------|------|--------|-------------------------------------------------------------------------------------------------------------------------------|-----|
| 576 | delta-valerolactone | massoia lactone     |      |      |      | 2.4:1  | { <chem>[*][*]OCCCCC(=O)[*]</chem> },<br><chem>[*]OCCCCC(=O)[*]</chem> , <chem>[*]OC(CCCCC)CC=CC(O)[*]</chem> }               | M36 |
| 577 | e-caprolactone      | beta-propiolactone  |      |      |      | 0.25:1 | { <chem>[*][*]OCCCCC(=O)[*]</chem> },<br><chem>[*]OCCCCC(=O)[*]</chem> , <chem>[*]OCCC(=O)[*]</chem> }                        | M33 |
| 578 | beta-propiolactone  | e-caprolactone      |      |      |      | 1:0.2  | { <chem>[*][*]OCCC(=O)[*]</chem> },<br><chem>[*]OCCC(=O)[*]</chem> , <chem>[*]OCCCCC(=O)[*]</chem> }                          | M33 |
| 579 | e-caprolactone      | delta-valerolactone | 7.81 | 9.43 | 1.21 | NR     | { <chem>[*][*]OCCCCC(=O)[*]</chem> },<br><chem>[*]OCCCCC(=O)[*]</chem> , <chem>[*]OCCCCC(=O)[*]</chem> }                      | M33 |
| 580 | pentadecanolide     | b-butyrolactone     |      |      |      | 2.8:1  | { <chem>[*][*]OCCCCCCCCCCCCCCC(=O)[*]</chem> },<br><chem>[*]OCCCCCCCCCCCCCCC(=O)[*]</chem> , <chem>[*]OC(C)CC(=O)[*]</chem> } | M36 |
| 581 | delta-valerolactone | e-caprolactone      |      |      |      | NR     | { <chem>[*][*]OCCCCC(=O)[*]</chem> },<br><chem>[*]OCCCCC(=O)[*]</chem> , <chem>[*]OCCCCC(=O)[*]</chem> }                      | M33 |
| 582 | b-butyrolactone     | pentadecanolide     |      |      |      | 1.3:1  | { <chem>[*][*]OC(C)CC(=O)[*]</chem> },<br><chem>[*]OC(C)CC(=O)[*]</chem> , <chem>[*]OCCCCCCCCCCCCCCC(=O)[*]</chem> }          | M36 |
| 583 | pentadecanolide     | delta-valerolactone |      |      |      | NR     | { <chem>[*][*]OCCCCCCCCCCCCCCC(=O)[*]</chem> },<br><chem>[*]OCCCCCCCCCCCCCCC(=O)[*]</chem> , <chem>[*]OCCCC(=O)[*]</chem> }   | M36 |
| 584 | delta-valerolactone | pentadecanolide     |      |      |      | NR     | { <chem>[*][*]OCCCCC(=O)[*]</chem> },<br><chem>[*]OCCCCC(=O)[*]</chem> , <chem>[*]OCCCCCCCCCCCCCCC(=O)[*]</chem> }            | M36 |

Supplementary Dataset S4: Polymer Library Members

|     |                     |                     |       |       |      |           |                                                                                                                             |     |
|-----|---------------------|---------------------|-------|-------|------|-----------|-----------------------------------------------------------------------------------------------------------------------------|-----|
| 585 | b-butyrolactone     | delta-valerolactone | 31.17 | 56.14 | 1.30 | 1.3:1     | { <chem>[*]OC(C)CC(=O)[*]</chem> },<br>{ <chem>[*]OC(C)CC(=O)[*]</chem> },{ <chem>[*]OCCCCC(=O)[*]</chem> }                 | M36 |
| 586 | beta-propiolactone  | delta-valerolactone |       |       |      | 2.3:1     | { <chem>[*]OCCC(=O)[*]</chem> },<br>{ <chem>[*]OCCC(=O)[*]</chem> },{ <chem>[*]OCCCCC(=O)[*]</chem> }                       | M33 |
| 587 | delta-valerolactone | b-butyrolactone     | 43.82 | 68.79 | 2.42 | 2.9:1     | { <chem>[*]OCCCCC(=O)[*]</chem> },<br>{ <chem>[*]OCCCCC(=O)[*]</chem> },{ <chem>[*]OC(C)CC(=O)[*]</chem> }                  | M36 |
| 588 | delta-valerolactone | beta-propiolactone  |       |       |      | 1.3:1     | { <chem>[*]OCCCCC(=O)[*]</chem> },<br>{ <chem>[*]OCCCCC(=O)[*]</chem> },{ <chem>[*]OCCC(=O)[*]</chem> }                     | M33 |
| 589 | beta-propiolactone  | glycolide           |       |       |      | Insoluble | { <chem>[*]OCCC(=O)[*]</chem> },<br>{ <chem>[*]OCCC(=O)[*]</chem> },{ <chem>[*]OCC(=O)OCC(=O)[*]</chem> }                   | M34 |
| 590 | glycolide           | beta-propiolactone  |       |       |      | 1.5:1     | { <chem>[*]OCC(=O)OCC(=O)[*]</chem> },<br>{ <chem>[*]OCC(=O)OCC(=O)[*]</chem> },{ <chem>[*]OCCCC(=O)[*]</chem> }            | M34 |
| 591 | beta-propiolactone  | lactide             |       |       |      | Insoluble | { <chem>[*]OCCC(=O)[*]</chem> },<br>{ <chem>[*]OCCC(=O)[*]</chem> },{ <chem>[*]OC(C)C(=O)OC(C)C(=O)[*]</chem> }             | M33 |
| 592 | lactide             | beta-propiolactone  |       |       |      | Insoluble | { <chem>[*]OC(C)C(=O)OC(C)C(=O)[*]</chem> },<br>{ <chem>[*]OC(C)C(=O)OC(C)C(=O)[*]</chem> },{ <chem>[*]OCCC(=O)[*]</chem> } | M33 |
| 593 | delta-valerolactone | glycolide           |       |       |      | Insoluble | { <chem>[*]OCCCCC(=O)[*]</chem> },<br>{ <chem>[*]OCCCCC(=O)[*]</chem> },{ <chem>[*]OCC(=O)OCC(=O)[*]</chem> }               | M34 |
| 594 | glycolide           | delta-valerolactone |       |       |      | Insoluble | { <chem>[*]OCC(=O)OCC(=O)[*]</chem> },<br>{ <chem>[*]OCC(=O)OCC(=O)[*]</chem> },{ <chem>[*]OCCCCC(=O)[*]</chem> }           | M34 |

Supplementary Dataset S4: Polymer Library Members

|     |                     |                      |       |       |      |           |                                                                                                                                      |     |
|-----|---------------------|----------------------|-------|-------|------|-----------|--------------------------------------------------------------------------------------------------------------------------------------|-----|
| 595 | delta-valerolactone | lactide              | 6.80  | 9.25  | 1.36 | Insoluble | $\{[\text{OCCCCC}(=\text{O})], [\text{OCCCCC}(=\text{O})], [\text{OC}(C)C(=\text{O})OC(C)C(=\text{O})]\}$                            | M33 |
| 596 | lactide             | delta-valerolactone  | 27.72 | 36.89 | 1.33 | 1.3:1     | $\{[\text{OC}(C)C(=\text{O})OC(C)C(=\text{O})], [\text{OC}(C)C(=\text{O})OC(C)C(=\text{O})], [\text{OCCCCC}(=\text{O})]\}$           | M33 |
| 597 | e-decalactone       |                      |       |       |      | NA        | $\{[\text{OC}(CCCC)CCCC(=\text{O})]\}$                                                                                               | M35 |
| 598 | pentadecanolide     |                      |       |       |      | NA        | $\{[\text{OCCCCCCCCCCCCCCC}(=\text{O})]\}$                                                                                           | M35 |
| 599 | 16-hexadecanolide   |                      |       |       |      | NA        | $\{[\text{OCCCCCCCCCCCCCCCC}(=\text{O})]\}$                                                                                          | M35 |
| 600 | coumarin            |                      |       |       |      | NA        | $\{[\text{Oc}(cccc1)c1C=CC(=\text{O})]\}$                                                                                            | M35 |
| 601 | b-butyrolactone     |                      |       |       |      | NA        | $\{[\text{OC}(C)CC(=\text{O})]\}$                                                                                                    | M35 |
| 602 | lactide             | undecanoic d-lactone |       |       |      | 6.5:1     | $\{[\text{OC}(C)C(=\text{O})OC(C)C(=\text{O})], [\text{OC}(C)C(=\text{O})OC(C)C(=\text{O})], [\text{OC}(CCCC)CCCC(=\text{O})]\}$     | M36 |
| 603 | lactide             | d-nonalactone        | 11.45 | 20.10 | 1.76 | 1.9:1     | $\{[\text{OC}(C)C(=\text{O})OC(C)C(=\text{O})], [\text{OC}(C)C(=\text{O})OC(C)C(=\text{O})], [\text{OC}(CCCC)CCCC(=\text{O})]\}$     | M36 |
| 604 | lactide             | pentadecanolide      | 5.90  | 29.14 | 4.94 | 4:1       | $\{[\text{OC}(C)C(=\text{O})OC(C)C(=\text{O})], [\text{OC}(C)C(=\text{O})OC(C)C(=\text{O})], [\text{OCCCCCCCCCCCCCCC}(=\text{O})]\}$ | M36 |
| 605 | 5-dodecanolide      |                      |       |       |      | NA        | $\{[\text{OC}(CCCCCC)CCCC(=\text{O})]\}$                                                                                             | M36 |

Supplementary Dataset S4: Polymer Library Members

|     |                          |                       |       |       |      |           |                                                                                                                                                  |     |
|-----|--------------------------|-----------------------|-------|-------|------|-----------|--------------------------------------------------------------------------------------------------------------------------------------------------|-----|
| 606 | lactide                  | b-butyrolactone       |       |       |      | 5:1       | { <chem>[*]OC(C)C(=O)OC(C)C(=O)[*]</chem> },<br>{ <chem>[*]OC(C)C(=O)OC(C)C(=O)[*]</chem> },<br>{ <chem>[*]OC(C)CC(=O)[*]</chem> }}              | M36 |
| 607 | lactide                  | 5-dodecanolide        | 22.07 | 46.87 | 2.12 | Insoluble | { <chem>[*]OC(C)C(=O)OC(C)C(=O)[*]</chem> },<br>{ <chem>[*]OC(C)C(=O)OC(C)C(=O)[*]</chem> },<br>{ <chem>[*]OC(CCCC<br/>CCC)CCCC(=O)[*]</chem> }} | M36 |
| 608 | lactide                  | 16-<br>hexadecanolide |       |       |      | 8:1       | { <chem>[*]OC(C)C(=O)OC(C)C(=O)[*]</chem> },<br>{ <chem>[*]OC(C)C(=O)OC(C)C(=O)[*]</chem> },<br>{ <chem>[*]OCCCCC<br/>CCCCCCCC(=O)[*]</chem> }}  | M36 |
| 609 | lactide                  | coumarin              | 9.44  | 30.94 | 3.28 | 1.5:1     | { <chem>[*]OC(C)C(=O)OC(C)C(=O)[*]</chem> },<br>{ <chem>[*]OC(C)C(=O)OC(C)C(=O)[*]</chem> },<br>{ <chem>[*]Oc(ccc1)c<br/>1C=CC(=O)[*]</chem> }}  | M36 |
| 610 | e-decalactone            | lactide               | 12.46 | 34.22 | 2.75 | 2:1       | { <chem>[*]OC(CCCC)CCCC(=O)[*]</chem> },<br>{ <chem>[*]OC(CCCC)CCCC(=O)[*]</chem> },<br>{ <chem>[*]OC(C)C(=O)<br/>OC(C)C(=O)[*]</chem> }}        | M36 |
| 611 | massoia<br>lactone       | lactide               | 11.91 | 19.43 | 1.63 | 2:1       | { <chem>[*]OC(CCCCC)CC=CC(O)[*]</chem> },<br>{ <chem>[*]OC(CCCCC)CC=CC(O)[*]</chem> },<br>{ <chem>[*]OC(C)C(=O)<br/>OC(C)C(=O)[*]</chem> }}      | M36 |
| 612 | undecanoic d-<br>lactone | lactide               | 29.03 | 38.09 | 1.31 | 1:2.5     | { <chem>[*]OC(CCCCCCC)CCCC(=O)[*]</chem> },<br>{ <chem>[*]OC(CCCCCCC)CCCC(=O)[*]</chem> },<br>{ <chem>[*]OC(C)C(=<br/>O)OC(C)C(=O)[*]</chem> }}  | M36 |

Supplementary Dataset S4: Polymer Library Members

|     |                   |                      |       |       |      |           |                                                                                                                                                                  |     |
|-----|-------------------|----------------------|-------|-------|------|-----------|------------------------------------------------------------------------------------------------------------------------------------------------------------------|-----|
| 613 | d-nonolactone     | lactide              | 14.07 | 20.59 | 1.46 | 1:2.9     | { <chem>[*][*][*]OC(CCCC)CCCC(=O)[*]</chem> },<br>{ <chem>[*][*][*]OC(CCCC)CCCC(=O)[*]</chem> },<br>{ <chem>[*][*][*]OC(C)C(=O)OC(C)C(=O)[*]</chem> }}           | M36 |
| 614 | pentadecanolide   | lactide              | 12.31 | 17.80 | 1.45 | 1.8:1     | { <chem>[*][*][*]OCCCCCCCCCCCCCCCC(=O)[*]</chem> },<br>{ <chem>[*][*][*]OCCCCCCCCCCCCCCCC(=O)[*]</chem> },<br>{ <chem>[*][*][*]OC(C)C(=O)OC(C)C(=O)[*]</chem> }} | M36 |
| 616 | 5-dodecanolide    | lactide              | 12.84 | 20.87 | 1.63 | 2.8:1     | { <chem>[*][*][*]OC(CCCCCC)CCCC(=O)[*]</chem> },<br>{ <chem>[*][*][*]OC(CCCCCC)CCCC(=O)[*]</chem> },<br>{ <chem>[*][*][*]OC(C)C(=O)OC(C)C(=O)[*]</chem> }}       | M36 |
| 617 | 16-hexadecanolide | lactide              |       |       |      | 0.45:1    | { <chem>[*][*][*]OCCCCCCCCCCCCCCCC(=O)[*]</chem> },<br>{ <chem>[*][*][*]OCCCCCCCCCCCCCCCC(=O)[*]</chem> },<br>{ <chem>[*][*][*]OC(C)C(=O)OC(C)C(=O)[*]</chem> }} | M36 |
| 618 | glycolide         | ε-decalactone        |       |       |      | 1:0       | { <chem>[*][*][*]OCC(=O)OCC(=O)[*]</chem> },<br>{ <chem>[*][*][*]OCC(=O)OCC(=O)[*]</chem> },<br>{ <chem>[*][*][*]OC(CCCC)CCC(CC(=O)[*])</chem> }}                | M36 |
| 619 | glycolide         | massoia lactone      |       |       |      | Insoluble | { <chem>[*][*][*]OCC(=O)OCC(=O)[*]</chem> },<br>{ <chem>[*][*][*]OCC(=O)OCC(=O)[*]</chem> },<br>{ <chem>[*][*][*]OC(CCCCC)CC(CC(O)[*])</chem> }}                 | M36 |
| 620 | glycolide         | undecanoic d-lactone |       |       |      | 1:0       | { <chem>[*][*][*]OCC(=O)OCC(=O)[*]</chem> },<br>{ <chem>[*][*][*]OCC(=O)OCC(=O)[*]</chem> },<br>{ <chem>[*][*][*]OC(CCCCC)CCC(=O)[*]</chem> }}                   | M36 |

Supplementary Dataset S4: Polymer Library Members

|     |               |                       |      |      |      |           |                                                                                                                                  |     |
|-----|---------------|-----------------------|------|------|------|-----------|----------------------------------------------------------------------------------------------------------------------------------|-----|
| 621 | glycolide     | d-nonolactone         |      |      |      | 1:0       | { <chem>[*][*][*]OCC(=O)OCC(=O)[*],</chem><br><chem>[*]OCC(=O)OCC(=O)[*],[*]OC(CCCC)CCC</chem><br><chem>C(=O)[*][*]</chem> }     | M36 |
| 622 | glycolide     | pentadecanolide       |      |      |      | Insoluble | { <chem>[*][*][*]OCC(=O)OCC(=O)[*],</chem><br><chem>[*]OCC(=O)OCC(=O)[*],[*]OCCCCCCCCC</chem><br><chem>CCCCC(=O)[*][*]</chem> }  | M36 |
| 623 | glycolide     | b-butyrolactone       | 5.70 | 7.50 | 1.32 | 1:0       | { <chem>[*][*][*]OCC(=O)OCC(=O)[*],</chem><br><chem>[*]OCC(=O)OCC(=O)[*],[*]OC(C)CC(=O)[*][</chem><br><chem>]</chem> }           | M36 |
| 624 | glycolide     | 5-dodecanolide        |      |      |      | Insoluble | { <chem>[*][*][*]OCC(=O)OCC(=O)[*],</chem><br><chem>[*]OCC(=O)OCC(=O)[*],[*]OC(CCCCCC)</chem><br><chem>CCCC(=O)[*][*]</chem> }   | M36 |
| 625 | glycolide     |                       |      |      |      | NA        | { <chem>[*][*][*]OCC(=O)OCC(=O)[*][*]</chem> }                                                                                   | M34 |
| 626 | glycolide     | 16-<br>hexadecanolide |      |      |      | Insoluble | { <chem>[*][*][*]OCC(=O)OCC(=O)[*],</chem><br><chem>[*]OCC(=O)OCC(=O)[*],[*]OCCCCCCCCC</chem><br><chem>CCCCC(=O)[*][*]</chem> }  | M36 |
| 627 | glycolide     | coumarin              |      |      |      | 0.8:1     | { <chem>[*][*][*]OCC(=O)OCC(=O)[*],</chem><br><chem>[*]OCC(=O)OCC(=O)[*],[*]Oc(cccc1)c1C=C</chem><br><chem>C(=O)[*][*]</chem> }  | M36 |
| 628 | e-decalactone | glycolide             |      |      |      | Insoluble | { <chem>[*][*][*]OC(CCCC)CCCCC(=O)[*],</chem><br><chem>[*]OC(CCCC)CCCCC(=O)[*],[*]OCC(=O)O</chem><br><chem>CC(=O)[*][*]</chem> } | M36 |

## Supplementary Dataset S4: Polymer Library Members

|     |                           |           |           |                                                                                      |     |
|-----|---------------------------|-----------|-----------|--------------------------------------------------------------------------------------|-----|
| 629 | massoia lactone           | glycolide | 0.8:1     | {[<]OC(CCCCC)CC=CC(O)[>],<br>[<]OC(CCCCC)CC=CC(O)[>],[<]OCC(=O)O<br>CC(=O)[>]}       | M36 |
| 630 | undecanoic d-lactone      | glycolide | Insoluble | {[<]OC(CCCCC)CCCC(=O)[>],<br>[<]OC(CCCCC)CCCC(=O)[>],[<]OCC(=O)<br>OCC(=O)[>]}       | M36 |
| 631 | d-nonanolactone           | glycolide | Insoluble | {[<]OC(CCCC)CCCC(=O)[>],<br>[<]OC(CCCC)CCCC(=O)[>],[<]OCC(=O)OC<br>C(=O)[>]}         | M36 |
| 632 | pentadecanoli<br>de       | glycolide | Insoluble | {[<]OCCCCCCCCCCCCCCC(=O)[>],<br>[<]OCCCCCCCCCCCCCCC(=O)[>],[<]OCC(<br>=O)OCC(=O)[>]} | M36 |
| 633 | b-<br>butyrolactone       | glycolide | 0:1       | {[<]OC(C)CC(=O)[>],<br>[<]OC(C)CC(=O)[>],[<]OCC(=O)OCC(=O)[>]<br>]}                  | M36 |
| 634 | 5-<br>dodecanolide        | glycolide | Insoluble | {[<]OC(CCCCC)CCCC(=O)[>],<br>[<]OC(CCCCC)CCCC(=O)[>],[<]OCC(=O)<br>OCC(=O)[>]}       | M36 |
| 635 | 16-<br>hexadecanolid<br>e | glycolide | Insoluble | {[<]OCCCCCCCCCCCCCCC(=O)[>],<br>[<]OCCCCCCCCCCCCCCC(=O)[>],[<]OC<br>C(=O)OCC(=O)[>]} | M36 |



Supplementary Dataset S4: Polymer Library Members

|     |           |                      |       |                                                                                                              |     |
|-----|-----------|----------------------|-------|--------------------------------------------------------------------------------------------------------------|-----|
| 636 | glycolide | lactide              | 3:1   | $\{ \{ [ < ] OCC(=O)OCC(=O)[ > ], [ < ] OCC(=O)OCC(=O)[ > ], [ < ] OC(C)C(=O)OC(C)C(=O)[ > ] \} \}$          | M34 |
| 637 | coumarin  | glycolide            | 1:0   | $\{ \{ [ < ] Oc(cccc1)c1C=CC(=O)[ > ], [ < ] Oc(cccc1)c1C=CC(=O)[ > ], [ < ] OCC(=O)OC C(=O)[ > ] \} \}$     | M36 |
| 638 | coumarin  | e-decalactone        | 2.6:1 | $\{ \{ [ < ] Oc(cccc1)c1C=CC(=O)[ > ], [ < ] Oc(cccc1)c1C=CC(=O)[ > ], [ < ] OC(CCCC)C CCCC(=O)[ > ] \} \}$  | M36 |
| 639 | coumarin  | massoia lactone      | 2:1   | $\{ \{ [ < ] Oc(cccc1)c1C=CC(=O)[ > ], [ < ] Oc(cccc1)c1C=CC(=O)[ > ], [ < ] OC(CCCCC) CC=CC(O)[ > ] \} \}$  | M36 |
| 640 | coumarin  | undecanoic d-lactone | 3.2:1 | $\{ \{ [ < ] Oc(cccc1)c1C=CC(=O)[ > ], [ < ] Oc(cccc1)c1C=CC(=O)[ > ], [ < ] OC(CCCCC C)CCCC(=O)[ > ] \} \}$ | M36 |
| 641 | coumarin  | d-nonalactone        | 2.2:1 | $\{ \{ [ < ] Oc(cccc1)c1C=CC(=O)[ > ], [ < ] Oc(cccc1)c1C=CC(=O)[ > ], [ < ] OC(CCCC)C CCC(=O)[ > ] \} \}$   | M36 |
| 642 | coumarin  | pentadecanolide      | 2.1:1 | $\{ \{ [ < ] Oc(cccc1)c1C=CC(=O)[ > ], [ < ] Oc(cccc1)c1C=CC(=O)[ > ], [ < ] OCCCCCCC CCCCCC(=O)[ > ] \} \}$ | M36 |

Supplementary Dataset S4: Polymer Library Members

|     |                   |                 |       |                                                                                                                                                                                                                                                                                   |     |
|-----|-------------------|-----------------|-------|-----------------------------------------------------------------------------------------------------------------------------------------------------------------------------------------------------------------------------------------------------------------------------------|-----|
| 643 | coumarin          | b-butyrolactone | 10:1  | $\{[\text{<}[\text{<}]\text{Oc}(\text{cccc}1)\text{c}1\text{C}=\text{CC}(=\text{O})[\text{>}], [\text{<}]\text{Oc}(\text{cccc}1)\text{c}1\text{C}=\text{CC}(=\text{O})[\text{>}], [\text{<}]\text{OC}(\text{C})\text{CC}(=\text{O})[\text{>}]\}$                                  | M36 |
| 644 | coumarin          | 5-dodecanolide  | 10:1  | $\{[\text{<}[\text{<}]\text{Oc}(\text{cccc}1)\text{c}1\text{C}=\text{CC}(=\text{O})[\text{>}], [\text{<}]\text{Oc}(\text{cccc}1)\text{c}1\text{C}=\text{CC}(=\text{O})[\text{>}], [\text{<}]\text{OC}(\text{CCCCC}\text{CC})\text{CCCC}(=\text{O})[\text{>}]\}$                   | M36 |
| 645 | e-decalactone     | coumarin        | 0.8:1 | $\{[\text{<}[\text{<}]\text{OC}(\text{CCCC})\text{CCCCC}(=\text{O})[\text{>}], [\text{<}]\text{OC}(\text{CCCC})\text{CCCCC}(=\text{O})[\text{>}], [\text{<}]\text{Oc}(\text{cccc}1)\text{c}1\text{C}=\text{CC}(=\text{O})[\text{>}]\}$                                            | M36 |
| 646 | lactide           | glycolide       | 1.5:1 | $\{[\text{<}[\text{<}]\text{OC}(\text{C})\text{C}(=\text{O})\text{OC}(\text{C})\text{C}(=\text{O})[\text{>}], [\text{<}]\text{OC}(\text{C})\text{C}(=\text{O})\text{OC}(\text{C})\text{C}(=\text{O})[\text{>}], [\text{<}]\text{OCC}(=\text{O})\text{OCC}(=\text{O})[\text{>}]\}$ | M34 |
| 647 | pentadecanolide   | coumarin        | 2:1   | $\{[\text{<}[\text{<}]\text{OCCCCCCCCCCCCCCCC}(=\text{O})[\text{>}], [\text{<}]\text{OCCCCCCCCCCCCCCCC}(=\text{O})[\text{>}], [\text{<}]\text{Oc}(\text{cccc}1)\text{c}1\text{C}=\text{CC}(=\text{O})[\text{>}]\}$                                                                | M36 |
| 648 | b-butyrolactone   | coumarin        | 0.2:1 | $\{[\text{<}[\text{<}]\text{OC}(\text{C})\text{CC}(=\text{O})[\text{>}], [\text{<}]\text{OC}(\text{C})\text{CC}(=\text{O})[\text{>}], [\text{<}]\text{Oc}(\text{cccc}1)\text{c}1\text{C}=\text{CC}(=\text{O})[\text{>}]\}$                                                        | M36 |
| 649 | 16-hexadecanolide | coumarin        | 1:0   | $\{[\text{<}[\text{<}]\text{OCCCCCCCCCCCCCCCC}(=\text{O})[\text{>}], [\text{<}]\text{OCCCCCCCCCCCCCCCC}(=\text{O})[\text{>}], [\text{<}]\text{Oc}(\text{cccc}1)\text{c}1\text{C}=\text{CC}(=\text{O})[\text{>}]\}$                                                                | M36 |

Supplementary Dataset S4: Polymer Library Members

|     |                     |                      |       |       |      |        |                                                                                                                                                                       |     |
|-----|---------------------|----------------------|-------|-------|------|--------|-----------------------------------------------------------------------------------------------------------------------------------------------------------------------|-----|
| 650 | coumarin            | e-caprolactone       |       |       |      | 2:1    | $\{ \square [ < ] O c ( c c c c 1 ) c 1 C = C C ( = O ) [ > ] , [ < ] O c ( c c c c 1 ) c 1 C = C C ( = O ) [ > ] , [ < ] O C C C C C C ( = O ) [ > ] \square \}$     | M36 |
| 651 | coumarin            | delta-valerolactone  |       |       |      | 3.3:1  | $\{ \square [ < ] O c ( c c c c 1 ) c 1 C = C C ( = O ) [ > ] , [ < ] O c ( c c c c 1 ) c 1 C = C C ( = O ) [ > ] , [ < ] O C C C C C ( = O ) [ > ] \square \}$       | M36 |
| 652 | lactide             | e-caprolactone       |       |       |      | 1:0    | $\{ \square [ < ] O C ( C ) C ( = O ) O C ( C ) C ( = O ) [ > ] , [ < ] O C ( C ) C ( = O ) O C ( C ) C ( = O ) [ > ] , [ < ] O C C C C C C ( = O ) [ > ] \square \}$ | M33 |
| 653 | e-caprolactone      | coumarin             |       |       |      | 3.25:1 | $\{ \square [ < ] O C C C C C C ( = O ) [ > ] , [ < ] O C C C C C C ( = O ) [ > ] , [ < ] O c ( c c c c 1 ) c 1 C = C C ( = O ) [ > ] \square \}$                     | M36 |
| 654 | delta-valerolactone | coumarin             |       |       |      | 1.6:1  | $\{ \square [ < ] O C C C C C ( = O ) [ > ] , [ < ] O C C C C C ( = O ) [ > ] , [ < ] O c ( c c c c 1 ) c 1 C = C C ( = O ) [ > ] \square \}$                         | M36 |
| 655 | e-decalactone       | massoia lactone      | 9.82  | 15.79 | 1.61 | 2.1:1  | $\{ \square [ < ] O C ( C C C C ) C C C C C ( = O ) [ > ] , [ < ] O C ( C C C C ) C C C C C ( = O ) [ > ] , [ < ] O C ( C C C C ) C C = C C ( O ) [ > ] \square \}$   | M36 |
| 656 | e-decalactone       | undecanoic d-lactone | 12.97 | 19.54 | 1.51 | NR     | $\{ \square [ < ] O C ( C C C C ) C C C C C ( = O ) [ > ] , [ < ] O C ( C C C C ) C C C C C ( = O ) [ > ] , [ < ] O C ( C C C C ) C C C C C ( = O ) [ > ] \square \}$ | M36 |

Supplementary Dataset S4: Polymer Library Members

|      |                   |                              |       |       |      |       |                                                                                  |     |
|------|-------------------|------------------------------|-------|-------|------|-------|----------------------------------------------------------------------------------|-----|
| 657  | e-decalactone     | d-nonolactone                | 20.23 | 31.10 | 1.54 | NR    | $\{[<]OC(CCCC)CCCC(=O)[>], [<]OC(CCCC)CCCC(=O)[>], [<]OC(CCCC)CCCC(=O)[>] \}$    | M36 |
| 658  | e-decalactone     | pentadecanolide              | 23.44 | 44.05 | 1.88 | 2.9:1 | $\{[<]OC(CCCC)CCCC(=O)[>], [<]OC(CCCC)CCCC(=O)[>], [<]OCCCCC CCCCCCCC(=O)[>] \}$ | M36 |
| 659  | e-decalactone     | b-butyrolactone              | 19.18 | 28.78 | 1.50 | 3.2:1 | $\{[<]OC(CCCC)CCCC(=O)[>], [<]OC(CCCC)CCCC(=O)[>], [<]OC(C)CC(=O)[>] \}$         | M36 |
| 660  | e-decalactone     | 5-dodecanolide               | 19.63 | 30.55 | 1.56 | NR    | $\{[<]OC(CCCC)CCCC(=O)[>], [<]OC(CCCC)CCCC(=O)[>], [<]OC(CCCCC C)CCCC(=O)[>] \}$ | M36 |
| 661  | e-decalactone     | 16-hexadecanolide            | 21.40 | 41.60 | 1.94 | 2.8:1 | $\{[<]OC(CCCC)CCCC(=O)[>], [<]OC(CCCC)CCCC(=O)[>], [<]OCCCCC CCCCCCCC(=O)[>] \}$ | M36 |
| 301* | Succinic acid     | 1,9-nonanediol               | 12.74 | 44.30 | 3.48 | 1:1   | $\{[<]C(=O)CCC(=O)[<], [>]OCCCCCCCCCO[>] \}$                                     | M25 |
| 662* | pimelic acid      | 1,5-pentanediol              | 10.85 | 29.55 | 2.72 | 1:1   | $\{[<]C(=O)CCCCC(=O)[<], [>]OCCC(C)CCO[>] \}$                                    | M25 |
| 190* | Dimethylcarbonate | Bis(4-hydroxyphenyl) Sulfone | 2.48  | 2.48  | 1.00 | 1:1   | $\{[<]C(=O)[<], [>]Oc1ccc(cc1)S(=O)(=O)c2ccc(cc2)O[>] \}$                        | M29 |

\*indicates polymers with molecular weight confirmed by GPC, but clear on clear-zone assay test
